1 **Metabolism of glucose and trehalose by cyclic pentose phosphate**  
2 **pathway is essential for effective immune response in *Drosophila***

3

4 Michalina Kazek<sup>1</sup>, Lenka Chodáková<sup>1</sup>, Katharina Lehr<sup>1</sup>, Lukáš Strych<sup>1</sup>, Pavla Nedbalová<sup>1</sup>, Ellen  
5 McMullen<sup>1</sup>, Adam Bajgar<sup>1</sup>, Petr Šimek<sup>2</sup>, Martin Moos<sup>2</sup>, Tomáš Doležal<sup>1\*</sup>

6

7 <sup>1</sup> Department of molecular biology and genetics, Faculty of Science, University of South  
8 Bohemia, České Budějovice, Czech Republic

9 <sup>2</sup> Laboratory of Analytical Biochemistry and Metabolomics, Institute of Entomology, Biology  
10 Centre, Czech Academy of Sciences, České Budějovice, Czech Republic

11 \* Corresponding author

12 E-mail: tomas.dolezal@prf.jcu.cz

13

14

15 **Abstract**

16 Activation of immune cells requires the remodeling of cell metabolism in order to support  
17 immune function. We study these metabolic changes through the infection of *Drosophila* larvae  
18 by parasitoid wasp. Neutralization of the parasitoid egg involves the differentiation of  
19 lamellocytes, which encapsulate the egg. A melanization cascade is initiated, producing toxic  
20 molecules to destroy the egg; meanwhile the capsule created also protects the host from the  
21 toxic reaction. We combine transcriptomics and metabolomics, including <sup>13</sup>C-labeled glucose  
22 and trehalose tracing, as well as genetic manipulation of sugar metabolism to study changes in  
23 metabolism, specifically in *Drosophila* hemocytes. We found that hemocytes increase the  
24 expression of several carbohydrate transporters, and accordingly uptake of sugar during  
25 infection. These carbohydrates are metabolized by increased glycolysis, associated with lactate  
26 production, and cyclic pentose phosphate pathway (PPP), in which glucose-6-phosphate is re-  
27 oxidized to maximize NADPH production. Oxidative PPP is required for lamellocyte  
28 differentiation and resistance, as is systemic trehalose metabolism. In addition, fully  
29 differentiated lamellocytes use a cytoplasmic form of trehalase to cleave trehalose to glucose,  
30 within the cell, to fuel cyclic PPP. Intracellular trehalose metabolism is not required for  
31 resistance, but may be associated with host protection from its own toxic response. Thus, our  
32 results suggest that sugar metabolism within immune cells, and specifically in cyclic PPP, may be  
33 important for not only fighting infection, but also for protecting the host from its own immune  
34 response and ensuring sufficient fitness of the survivor.

35

36

## 37 Introduction

38 Quiescent immune cells require nutrients to efficiently carry out their basic functions. When  
39 activated, however, they must rapidly undertake many more functions, facilitated by the rapid  
40 generation of energy and biosynthetic intermediates [1]. Most types of mammalian immune  
41 cells and, as we have recently shown, insect immune cells become more dependent on glucose  
42 and have an increased rate of glycolysis during infection [1,2]. This allows for the rapid  
43 generation of ATP and branch into other metabolic pathways, for example the pentose  
44 phosphate pathway (PPP) [3]. The high rate of energy production and large amounts of  
45 intermediates make immune cells highly nutrient demanding during their activation. We have  
46 previously shown that *Drosophila melanogaster* larval immune cells (hemocytes) increase their  
47 consumption of total systemic glucose from 10% to 27% during the immune response to a  
48 parasitoid wasp [4]. Hemocytes release adenosine to suppress carbohydrate consumption by  
49 non-immune tissues to ensure their own supply, which is critical for an effective immune  
50 response [4].

51 Trehalose is the primary carbohydrate of insects; when cleaved by trehalase (Treh) it provides a  
52 rapid source of glucose [5]. Unlike glucose, trehalose is a non-reducing sugar and thus the  
53 hemolymph of *Drosophila* larvae contains a tenfold higher concentration of trehalose than  
54 glucose [4,6]. This serves as a buffer for glucose homeostasis to ensure robust and stable  
55 development [7]. We previously found that hemocytes strongly upregulate expression of the  
56 trehalose transporter Tret1-1 and Treh during immune response [4]. This was later confirmed by  
57 single cell transcriptomics studies [8,9], which showed lamellocyte-specific expression of Tret1-1  
58 and Treh. These results suggest an important role for trehalose during immune response, which  
59 has also been shown in house flies [10].

60 We use a model of infection of *Drosophila* larvae by the parasitoid wasp *Leptopilina boulardi*  
61 where the wasp injects its egg during larval development [11]. Within a few hours, the egg is  
62 recognized by circulating hemocytes (plasmatocytes), which induce an immune response. Sessile  
63 hemocytes enter the circulation, some attach to the egg while others differentiate into  
64 specialized large flat cells called lamellocytes, which later encapsulate the egg. The melanization  
65 cascade is initiated in the forming capsule [12] and within approximately 48 hours the parasitoid  
66 egg is destroyed. If the immune response is not fast or efficient, the parasitoid larva emerges  
67 from the egg and eventually consumes the developing fly in the pupa [4].

68 Melanization is associated with both production and scavenging of toxic substances [12].  
69 Encapsulation/melanization thus serves the dual purpose of producing and concentrating toxic  
70 substances inside the capsule to kill the parasitoid, while protecting the host from escaping toxic  
71 radicals. Therefore, there are metabolic requirements associated with lamellocyte  
72 differentiation (global changes in gene expression, cytoskeletal and membrane rearrangements,  
73 etc.), production of toxic molecules (e.g., reactive oxygen species, ROS), and host protection  
74 mechanisms (e.g., antioxidant production). Metabolic reprogramming for the individual tasks  
75 involved in killing pathogens and protecting the host is essential for the survival of the infected  
76 larva and the future fitness of the surviving organism. However, changes in the actual  
77 metabolism of larval hemocytes during immune response to wasp infection have not yet been  
78 investigated.

79 One of the most important branches from increased glycolysis during immune response is the  
80 PPP [3], generating NADPH and pentoses as precursors for nucleotides and coenzymes [13].  
81 NADPH is essential in activated immune cells for lipid biosynthesis, for the ROS production

82 needed to fight pathogens [14], as well as for the production of antioxidants, such as  
83 glutathione, to protect the host from excessive ROS exposure [15]. Cells can dramatically  
84 increase NADPH production through cyclic PPP, which repeatedly oxidizes glucose-6-phosphate  
85 (G6P), as recently demonstrated in neutrophils [3].

86 Immune cells have privileged access to nutrients during immune response [16]. We hypothesize  
87 that hemocytes can secure prioritized allocation of carbohydrates using trehalose, i.e. by  
88 expressing *Tret1-1* along with *Treh*. To test this hypothesis, we employed <sup>13</sup>C stable isotope  
89 tracing [17] to analyze metabolic changes in hemocytes as well as genetically manipulating  
90 trehalose metabolism to investigate its role during immune response to parasitoid wasps. We  
91 found that hemocytes express several carbohydrate transporters, some of which are  
92 dramatically up-regulated during infection. <sup>13</sup>C tracing experiments show that activated  
93 hemocytes increase the uptake and metabolism of glucose and trehalose via glycolysis and in  
94 particular the cyclic PPP, which is essential for lamellocyte production and resistance. Systemic  
95 trehalose metabolism is important for an effective immune response, but trehalose itself is only  
96 metabolized in fully differentiated lamellocytes, which is not necessary for resistance but  
97 instead appears to be important for lamellocyte-mediated host protection.

98

## 99 **Results**

### 100 **Activated hemocytes increase the expression of** 101 **carbohydrate transporters and trehalase**

102 *Drosophila* hemocytes increase their uptake of carbohydrates during parasitoid wasp infection  
103 [4], we have therefore analyzed the expression of carbohydrate transporters in immune cells.  
104 The SLC2 family of hexose sugar transporters in *Drosophila* comprises 31 genes (S1 File; FlyBase  
105 ID: FBgg0000691), most of which have not been functionally characterized. Our bulk  
106 transcriptomic analysis showed that the expression of ten of these genes is greater than three  
107 transcripts per million (TPM) in hemocytes (S1 file and S1 Table) and four of these genes are  
108 expressed in hemocytes during infection – *Tret1-1*, *CG4607*, *sut1* and *CG1208* (Fig 1A). *Tret1-1*  
109 has been functionally characterized as glucose and trehalose transporter [18] and *CG4607*  
110 appears to be involved in lysosomal glucose metabolism [19]. Both *Tret1-1* and *CG4607* are  
111 weakly expressed in hemocytes in the uninfected state, but their expression strongly increases  
112 during infection (Fig 1A, S1 file). Based on scRNAseq [9], both are expressed exclusively in  
113 lamellocytes (S1 file). *sut1* is highly expressed in most hemocyte types in both uninfected and  
114 infected state (Fig 1A and S1 file). MFS3, which belongs to the SLC17 family of organic anion  
115 transporters, has also been shown to transport glucose and trehalose [20], it's strongest  
116 expression in hemocytes is in the uninfected state, and decreases during infection (Fig 1A and S1  
117 file). The functionally uncharacterized *CG1208* shows the strongest increase in expression upon  
118 infection, mainly in lamellocytes (Fig 1A and S1 file). Thus, MFS3 and *sut1* appear to provide  
119 basal carbohydrate transport in most hemocyte types in the uninfected state, whereas *Tret1-1*  
120 and presumably *CG4607* and *CG1208* provide carbohydrate transport in lamellocytes during  
121 infection.

122

123 **Fig 1. Analysis of carbohydrate metabolism gene expression.**

124 (A) Heat map of expression (bulk RNAseq) of selected transporters and trehalase in circulating  
125 hemocytes, lymph gland and wing disc from uninfected (Uninf) and infected (INF) third-instar  
126 larvae collected 9 and 18 hours after the start of infection = 0 hour = 72 hours after egg laying.  
127 Values given in each cell are transcripts per million (TPM). (B) Expression of the *trehalase* (*Treh*)  
128 gene (bulk RNAseq) in circulating hemocytes and lymph gland. Each dot represents a biological  
129 replicate in TPM, bars represent mean  $\pm$  SEM. Samples were analyzed using DESeq2 in Geneious  
130 Prime (S2 Table), \*\*\*\* shows adjusted  $P < 0.0001$ , ns = not significant. (C) Transcript-specific  
131 analysis of *Treh* expression by RT-qPCR 18 hours after the start of infection. cTreh, represents  
132 cytoplasmic trehalase (primers cTreh-F and Treh-R shown in (D)), increases 35-fold after  
133 infection. sTreh represents secreted trehalase (primers sTreh-F and Treh-R shown in (D)). Box  
134 and whiskers plots (median, 75th and 25th percentiles, and maximum/minimum) show fold  
135 change compared to uninfected cTreh samples (expression levels were normalized by *RpL32*  
136 expression in each sample), each dot represents a biological replicate. An unpaired two-tailed t  
137 test was used to compare uninfected and infected samples; \*\*\*\* $P < 0.0001$ . (D) Map of the *Treh*  
138 gene with individual transcripts (RA-RG). Lines show introns, boxes show exons with coding  
139 sequence in orange. Labeled arrows show primers used for RT-qPCR expression analysis. (E)  
140 Transcript specific analysis of trehalose transporter *Tret1-1* by RT-qPCR 18 hours after the start  
141 of infection. *Tret1-1-RA* (primers Tret-RA-F and Tret-RA-R shown in (F)) increases 31-fold after  
142 infection. *Tret1-1-RB* (primers Tret-RB-F and Tret-RB-R shown in (F)). Box and whiskers plots  
143 (median, 75th and 25th percentile, and maximum/minimum) show fold change compared to  
144 uninfected *Tret1-1-RA* samples (expression levels normalized by *RpL32* expression in each  
145 sample), each dot represents a biological replicate. Unpaired two-tailed t test was used to  
146 compare uninfected and infected samples; \*\*\* $P < 0.001$ , ns = not significant. (F) Map of the  
147 *Tret1-1* gene with RA and RB transcripts. Lines show introns, boxes show exons with coding  
148 sequence in orange. Labeled arrows show primers used for RT-qPCR expression analysis. (G)  
149 Schematic representation of a Gal4 knock-in into the first exon of *Treh-RA*, creating a 47-base  
150 deletion that removes both cTreh start codons, replaced by a cassette containing the Gal4  
151 coding sequence and an RFP marker, expressed downstream of the P3 regulatory sequence in  
152 the fly eye. The resulting fly strain is *Treh[RA $\Delta$ G4]*. (H) *Treh[RA $\Delta$ G4]*, expressing Gal4 in the cTreh  
153 expression pattern, drives UAS-GFP expression in differentiated lamellocytes (green) but not in  
154 plasmatocytes. Differential interference contrast (DIC) combined with fluorescence microscopy  
155 using 20x objective.

156

157 While *sut1* is moderately expressed in the lymph gland, we did not detect increased expression  
158 of transporters other than *CG1208* at 18 hours post infection (Fig 1A). MFS3 and Sut1 also  
159 appear to be major carbohydrate transporters in the wing disc, but there are no changes in  
160 carbohydrate transporters expression during infection (Fig 1A).

161 Interestingly, along with the trehalose transporter *Tret1-1*, expression of the enzyme *Treh*,  
162 which converts trehalose into two glucose molecules, is also strongly increased in hemocytes  
163 upon infection (Fig 1A and 1B), this increase is primarily due to expression in lamellocytes (S1  
164 File). *Treh* exists in two forms, cytoplasmic (cTreh) and secreted (sTreh; Fig 1D) [21], we  
165 therefore used transcript-specific qPCR to determine which form is expressed in hemocytes.  
166 cTreh transcripts (*Treh-RA*, *-RD*, *-RG*, *-RE*) increase 35-fold in hemocytes upon infection (Fig 1C).  
167 The transcripts for the sTreh form (*Treh-RC* and *-RF*) also increase during infection, but only  
168 slightly more than the basal level of cTreh. Therefore, substantially more cTreh than sTreh is  
169 expressed in hemocytes during infection. There are also two transcriptional variants of *Tret1-1*

170 (Fig 1F), with *Tret1-1-RA* increasing 31-fold upon infection, whereas there is no increase in the  
171 *Tret1-1-RB* variant (Fig 1E).

172 We generated a cTreh-specific mutant, *Treh[RAΔGal4]*, by replacing 47 bases including the first  
173 two start codons with the Gal4 coding sequence, which can also serve as an expression reporter  
174 (Fig 1G). By crossing this line with flies carrying *UAS-GFP* (Fig 1H and S1 Fig), we verified  
175 lamellocyte-specific expression of cTreh among hemocytes. cTreh is also expressed in other  
176 larval tissues, such as imaginal discs (S1 Fig) and brain (S2 Fig), with and without infection.

177 Our expression analysis showed that hemocytes express multiple carbohydrate transporters,  
178 some of which also dramatically increase expression during infection. This is consistent with our  
179 previous results that showed increased sugar consumption under these conditions. The  
180 combination of dramatically increased expression of trehalose transporters together with a  
181 cytoplasmic form of Treh exclusively in lamellocytes suggests the importance of trehalose  
182 metabolism in these cells.

183

## 184 **Activated hemocytes increase uptake and metabolism of** 185 **glucose and trehalose via glycolysis and pentose** 186 **phosphate pathway**

187 Our bulk transcriptomic analysis shows that all enzymes associated with glycolysis and PPP are  
188 strongly expressed in hemocytes in both the uninfected and infected state (Fig 2, S2 file and S2  
189 Table). The expression of specific genes in each pathway corresponds well with scRNAseq  
190 analyses (S2 file; [8,9]). Same glycolytic and PPP genes are also similarly expressed in the lymph  
191 gland and wing disc, both in uninfected and infected state (S2 file and S2 Table). Combining our  
192 bulk transcriptomics results with scRNAseq reveals a tendency for a slight decrease in the  
193 expression of glycolytic genes in most prohemocytes and plasmatocyte-like cells during  
194 infection, while expression shifts towards lamellocytes and crystal cells (S2 file). Expression of  
195 PPP genes generally does not change during infection. Phosphofructokinase (Pfk) shows the  
196 lowest expression of all glycolytic genes and is further reduced in all hemocyte types during  
197 infection, suggesting a shift away from glycolysis to PPP and back to glycolysis at the  
198 glyceraldehyde-3-phosphate level. Overall, the expression analysis does not indicate specific  
199 changes in these metabolic pathways in either hemocyte types, or during infection.

200

### 201 **Fig 2. Expression of glycolytic and pentose phosphate pathway enzymes in hemocytes.**

202 Diagram showing metabolic pathways; metabolites and enzymes are abbreviated with  
203 *Drosophila* gene names; strongly expressed genes in hemocytes are in large font in bold,  
204 moderately expressed genes in large font, and insignificantly expressed genes in small font.  
205 Trehalose metabolism is shown in grey, glycolysis in black, pentose phosphate pathway in blue,  
206 purine metabolism in orange and mitochondrial metabolism in green. Tables show glycolytic and  
207 PPP genes expression based on bulk RNAseq in transcripts per million (TPM) in circulating  
208 hemocytes at 18 hours after start of infection from the uninfected (18 h Uninf) and infected (18  
209 h INF) larvae; the red shading of the table highlights the strength of expression - white the  
210 weakest, red the strongest.

211

212 In order to monitor changes in the metabolism of hemocytes during infection, we used two  
213 approaches involving the tracing of metabolites labeled with stable  $^{13}\text{C}$  isotopes. In the first, we  
214 fed  $^{13}\text{C}$ -labeled glucose (D-glucose- $^{13}\text{C}_6$ ) to larvae at 16 hours post infection for 6 hours before  
215 collecting hemocytes at 22 hours post infection. After 6 hours of feeding, 22% of the glucose in  
216 the hemolymph was labeled (Fig 3A). Some of the labeled glucose was also converted to  
217 trehalose in the fat body, resulting in 16% of the circulating trehalose being labeled (at one of  
218 the two glucose units; Fig 3B). Both glucose and trehalose in the hemolymph increase during  
219 infection, and the increase is mainly due to the unlabeled sugars (Fig 3A and 3B), suggesting  
220 they come from stores, which is consistent with our previous results [4]. Hemocytes can directly  
221 take up labeled dietary glucose or convert labeled trehalose to glucose. There is five times more  
222 glucose in the infection-activated hemocytes than in the control (Fig 3C). The increased  $^{13}\text{C}$ -  
223 labeled glucose shows that hemocytes increase uptake of sugars upon infection (Fig 3C), again in  
224 agreement with our previous results [4].

225

### 226 **Fig 3. Analysis of hemocyte metabolism by stable $^{13}\text{C}$ isotope tracing.**

227 The bars show the mean metabolite amount - unlabeled form, or labeled with  $^{13}\text{C}$  stable  
228 isotope, or both, stacked in one bar - expressed by the normalized peak area, unless otherwise  
229 indicated in the graph title and at the Y-axis. Graphs labeled "*in vivo*" in black box - larvae were  
230 fed labeled D-glucose- $^{13}\text{C}_6$ . Graphs labeled "*ex vivo*" in gray box - hemocytes were incubated  
231 *ex vivo* with either labeled D-glucose- $^{13}\text{C}_6$  or  $\alpha,\alpha$ -trehalose- $^{13}\text{C}_{12}$ . Samples were obtained from  
232 hemocytes from uninfected (Uninf) or infected (INF) larvae. (A,B) Circulating glucose and  
233 trehalose levels in hemolymph and (C) intracellular glucose levels in hemocytes after *in vivo*  
234 feeding - (A,C) unlabeled (grey), fully labeled ( $^{13}\text{C}_6$  - red), (B) unlabeled (grey), fully labeled ( $^{13}\text{C}_{12}$   
235 - red), partially labeled ( $^{13}\text{C}_6$  - pink). The percentages above the columns express the fraction of  
236 the labelled from the total amount. (D,E) Intracellular glucose-6-phosphate and ribulose-5-  
237 phosphate levels in hemocytes upon *ex vivo* incubation with labeled glucose (left bars) or  
238 trehalose (right bars). The stacked bars combine unlabeled (gray), fully labeled ( $^{13}\text{C}_6$  or  $^{13}\text{C}_5$  in  
239 red), and partially labeled (one to five out of the six carbons labeled in the molecule, in pink). (F)  
240 Levels of  $^{13}\text{C}$ -labeled sedoheptulose-7-phosphate (all forms with any labeled carbon) in  
241 hemocytes upon *ex vivo* incubation. (G) Ratio of normalized peak areas of partially labeled  
242 relative to fully labeled glucose-6-phosphate after *in vivo* feeding. (H-K) Levels of unlabeled  
243 NADPH, GSH, GSSG, and taurine in hemocytes *ex vivo* or *in vivo* (indicated below the bars). (L,M)  
244 Levels of glyceraldehyde-3-phosphate and combined 2-phosphoglycerate with 3-  
245 phosphoglycerate in hemocytes upon *ex vivo* incubation with labeled glucose (left bars) or  
246 trehalose (right bars). Stacked bars show unlabeled (gray), fully labeled ( $^{13}\text{C}_3$  in red), and partially  
247 labeled (one and two out of the three carbons labeled in the molecule, in pink). (N) Fraction (%)  
248 of  $^{13}\text{C}$ -labeled intracellular lactate in total lactate upon *ex vivo* incubation with labeled glucose  
249 (left bars) and trehalose (right bars). (O) Levels of  $^{13}\text{C}$ -labeled citrate in hemocytes after *in vivo*  
250 feeding. Levels from infected larvae were corrected 1.6-fold based on labeling of the preceding  
251 pyruvate. (A-O) The sample from infected larvae was compared with that from uninfected larvae  
252 using unpaired t test or ordinary two-way ANOVA with multiple comparisons. Asterisks indicate  
253 p value (\*  $P < 0.05$ , \*\*  $P < 0.01$ , \*\*\*  $P < 0.001$ , \*\*\*\*  $P < 0.0001$ ) and are either above the bar in  
254 the corresponding color of the bar they compare within the stacked bars, or in black for a simple  
255 comparison. A bar without asterisks indicates a non-significant difference. Error bars represent  $\pm$   
256 SEM.

257

258 A direct comparison of the labeling of downstream metabolites between uninfected and  
259 infected larvae is complicated by the different percentage of labeled glucose within the  
260 hemocytes - 19% versus only 9% (Fig 3C) - which affects our ability to compare entry of labeled  
261 glucose into downstream pathways. To obtain a comparable amount of labeled glucose entering  
262 hemocytes, we used a second approach in which we incubated hemocytes in 100% D-glucose-  
263  $^{13}\text{C}_6$  *ex vivo*. This approach also allowed us to use labeled trehalose ( $\alpha,\alpha$ -trehalose- $^{13}\text{C}_{12}$ ) as a  
264 source and distinguish its metabolism from glucose. We first collected hemocytes by bleeding  
265 larvae 22 hours post infection and immediately incubated them *ex vivo* for 40 minutes in a  
266 solution containing 100%  $^{13}\text{C}$ -labeled glucose or trehalose.

267 By examining only one time point and working with a heterogeneous population of hemocytes  
268 *in vivo* for our  $^{13}\text{C}$ -labeled carbohydrates experiments we are unable to determine metabolic  
269 fluxes, however, we can still observe metabolic changes. Several interesting aspects of  
270 metabolism in activated hemocytes are revealed by glucose-6-phosphate (G6P) labeling. Firstly,  
271 G6P increases in activated hemocytes, including newly formed, i.e. labeled, G6P (Fig 3D),  
272 demonstrating that glucose metabolism is indeed enhanced during infection. Secondly,  
273 hemocytes of uninfected larvae metabolize glucose but almost no trehalose, which they  
274 metabolize substantially only during infection (e.g., Fig 3D, 3E and 3F). This is consistent with the  
275 fact that the cytoplasmic form of *Treh* is expressed only in lamellocytes. Therefore, using labeled  
276 trehalose as a source, most of the  $^{13}\text{C}$  incorporation can be attributed to lamellocyte  
277 metabolism. Additionally, fully labeled G6P- $^{13}\text{C}_6$  (red in Fig 3D) shows increased levels upon  
278 infection, but we also detected an increase in partially labeled G6P- $^{13}\text{C}_{1-5}$  (pink in Fig 3D).  
279 Partially labeled G6P can be generated from fully labeled glucose by cyclic PPP, in which  
280 pentoses formed by oxidative PPP are converted back to G6P by the action of  
281 transketolase/transaldolase in the non-oxidative PPP and the reverse action of glucose-6-  
282 phosphate isomerase (Fig 2 and S3; [22,23]). Since labeled pentoses represent a minor fraction  
283 (Fig 3E), they almost always combine with unlabeled pentoses to form partially labeled G6P (S3  
284 Fig). This is also the case when labeled trehalose is used as the source (Fig 3D), demonstrating  
285 that cyclic PPP is active in lamellocytes. Increased labeling of ribulose-5-phosphate (Fig 3E), a  
286 product of PPP, and sedoheptulose-7-phosphate (Fig 3F), an intermediate of  
287 transketolase/transaldolase activity, further supports increased PPP in hemocytes during  
288 infection. The intensification of cyclic PPP is also evidenced by the *in vivo* experiment mentioned  
289 above in which  $^{13}\text{C}$ -labeled glucose is fed to larvae. Although we cannot directly compare  
290 uninfected and infected larvae for the reasons mentioned above, we can compare the ratio of  
291 partially labeled G6P to fully labeled G6P. That is, how many molecules were converted back to  
292 G6P relative to the number of glucose molecules that entered the PPP. Whereas, in uninfected  
293 larvae there is only one partially labeled G6P molecule for every four fully labeled G6P  
294 molecules, in infected larvae this ratio increases to more than 1:1 (Fig 3G), indicating an  
295 intensified cyclic PPP. Oxidative PPP produces NADPH, which increases in hemocytes upon  
296 infection both *in vivo* and *ex vivo* (Fig 3H). One of the roles of NADPH is to reduce antioxidants  
297 such as glutathione, and we observed increased levels of GSH (Fig 3I), the reduced form of  
298 glutathione, in hemocytes from infected larvae, while the oxidized form GSSG is at comparable  
299 levels (Fig 3J). Flies use the thioredoxin system instead of glutathione reductase to reduce GSSG  
300 [24], and hemocytes highly express thioredoxin reductase Trxr1 and thioredoxin Trx-2 with  
301 greater expression in lamellocytes (S4 Fig). Trx2 is also a substrate for peroxiredoxins [25], which  
302 are also highly expressed in hemocytes (S4 Fig). Besides GSH, infection elevates another  
303 antioxidant, taurine, in hemocytes (Fig 3K).

304 Comparison of fractions with different numbers of labeled carbons in G6P and ribulose-5-  
305 phosphate reveals further insights (S5 Fig and S6 Fig). Before increasing amounts of labeled  
306 xylulose-5-phosphate and ribose-5-phosphate enter the transketolase/transaldolase conversion  
307 of pentoses to hexoses, the most common product is G6Pm+3 (pink in S3 Fig), which is formed  
308 by coupling labeled glyceraldehyde-3-phosphate with unlabeled sedoheptulose-7-phosphate.  
309 This is evident after a short *ex vivo* incubation, including incubation with trehalose, which is  
310 metabolized in lamellocytes (S5 Fig). Once the labeled pentoses enter the  
311 transketolase/transaldolase conversion to hexoses, G6Pm+2 begins to dominate (yellow in S3  
312 Fig). We observe this after prolonged exposure to  $^{13}\text{C}$  *in vivo* (S6 Fig). Ribulose-5-phosphate and  
313 ribose-5-phosphate can be formed both in oxidative PPP (thus generating NADPH) and in non-  
314 oxidative PPP, in which the opposite direction of transketolase/transaldolase activity generates  
315 pentoses without NADPH (scheme in Fig 2 and S7). If pentoses were formed predominantly by  
316 oxidative PPP, their partial/complete labeling pattern should match that of G6P (in some form  
317 minus one labeled carbon due to decarboxylation). This is the case in the *ex vivo* experiment,  
318 especially during infection (S5 Fig). However, our *in vivo* experiment showed a different pattern  
319 for both ribulose-5-phosphate and ribose-5-phosphate, where we detected much more m+1,  
320 m+2, and m+3 than m+5 (S6 Fig). This pattern is more consistent with a combination of fructose-  
321 6-phosphate and glyceraldehyde-3-phosphate with the opposite action of  
322 transketolase/transaldolase in non-oxidative PPP (S7 Fig). This suggests that at least some  
323 pentose phosphates are generated by non-oxidative PPP. This metabolism is most likely present  
324 in hemocytes from uninfected larvae as well as in some types of hemocytes present in the  
325 heterogeneous population during infection. *In vivo* experiments begin several hours before full  
326 lamellocyte differentiation; therefore, m+1 and m+3 likely combine both pentoses generated by  
327 non-oxidative PPP in some hemocytes and pentoses generated by oxidative PPP in other  
328 hemocytes.

329 To summarize this part, hemocytes from both uninfected and infected larvae use non-oxidative  
330 PPP to generate pentoses as well as cyclic PPP to generate NADPH. Cyclic PPP increases in  
331 hemocytes during infection and particularly in lamellocytes as evidenced by trehalose  
332 metabolism. As we present bulk metabolomics data, it is likely that different hemocyte types at  
333 different stages of infection use these pathways differently.

334 The total amount of glyceraldehyde-3-phosphate, which is a product of both glycolysis and PPP,  
335 as well as the labeled form, increased during infection, from both labeled glucose and trehalose  
336 (Fig 3L). Increased  $^{13}\text{C}$ -labeling was much less pronounced for the other glycolytic metabolites,  
337 2/3-phosphoglycerate (Fig 3M) and phosphoenolpyruvate (S8 Fig), but was again strongly  
338 detected in lamellocytes from labeled trehalose. Pyruvate was more difficult to detect in our  
339 metabolomics analysis (S8 Fig), and in the *ex vivo* experiment, the labeled pyruvate reached  
340 detectable levels only after infection (S2 Table). We have previously shown that hemocytes  
341 release more lactate during infection [26], which is confirmed here by lower lactate levels in  
342 hemocytes and higher levels in hemolymph (S8 Fig). The increased incorporation of  $^{13}\text{C}$  into  
343 lactate, from both glucose and trehalose (Fig 3N), demonstrates its increased production during  
344 infection.

345 As incorporation of  $^{13}\text{C}$  into tricarboxylic acid cycle metabolites is very low (less than 1%) after  
346 40 minutes of *ex vivo* incubation, we compared incorporation into citrate from the experiment  
347 with feeding  $^{13}\text{C}$ -labeled glucose for 6 hours. Incorporation is the same between uninfected and  
348 infected samples (Fig 3O) when values in infected samples are corrected for incorporation into  
349 pyruvate, the closest upstream metabolite (S8 Fig); there is a 1.6-fold higher probability that the



350 13C-labeled pyruvate is used in citrate formation in hemocytes from uninfected larvae than in  
351 those from infected larvae. Although the levels of 13C-labeled citrate and malate in the *ex vivo*  
352 experiment are very low, and thus difficult to compare, they also do not appear to be  
353 dramatically different (S8 Fig). This supports the notion that glucose-derived pyruvate is similarly  
354 translocated to mitochondria during infection. Nevertheless, mitochondrial metabolism needs  
355 to be further investigated.

356 Ribose-5-phosphate can be used for *de novo* purine/pyrimidine synthesis. This is indicated by  
357 the 13C labeling of AMP/ADP/ATP *in vivo* (S9 Fig), which increases upon infection, even without  
358 correction for the lower 13C fraction in ribose-5P. The partial labeling pattern of AMP/ADP/ATP  
359 with the m+1 fraction dominating (S9 Fig) indicates that nucleotides are primarily produced  
360 from ribose-5P generated by oxidative PPP. Increased labeling of UDP-glucose upon infection  
361 suggests that some of the glucose may be used for glucuronate interconversion and  
362 glycosylation (S8 Fig), but we did not further analyze this part of metabolism.

363 In summary, metabolic changes in hemocytes during infection include increased glucose uptake  
364 and, in lamellocytes, glucose production from trehalose. The major glucose utilization during  
365 infection appears to be in cyclic PPP, where G6P is oxidized in multiple rounds, as evidenced by  
366 increased partial G6P labeling. Downstream glycolysis is slightly increased, the increase is more  
367 robustly documented by lamellocyte-specific trehalose metabolism and is associated with  
368 increased lactate production released from hemocytes, while mitochondrial utilization of  
369 glycolysis products appears to be similar.

370

## 371 **Oxidative PPP is required for proper immune response**

372 Our metabolomics analysis shows that carbohydrate uptake and the oxidative PPP increase in  
373 hemocytes upon infection. To test the importance of the oxidative PPP, we used the double  
374 mutant *Pgd[n39] pn[1] Zw[lo2a]* in glucose 6-phosphate dehydrogenase (*Zwischenferment* or  
375 *Zw*), the first enzyme in the oxidative PPP, and in 6-phosphogluconate dehydrogenase (*Pgd*), the  
376 third enzyme in the oxidative PPP (Fig 4A); the double mutant is fully viable [27]. We also used a  
377 hemocyte-specific RNAi of *Zw* (Fig 4A and 4B) using *Srp-Gal4* and the *Zw* RNAi construct under  
378 the UAS promoter (*P{TRiP.HMC03068}attP2*). The number of plasmatocytes is not altered in  
379 either the double mutant, or hemocyte-specific knockdown of *Zw*, suggesting that regular  
380 hematopoiesis is not affected by these manipulations (Fig 4C). However, both in the double  
381 mutant and knockdown there is a decrease in lamellocyte number (Fig 4C) and survival (Fig 4D),  
382 demonstrating that oxidative PPP is important for effective lamellocyte differentiation and  
383 parasitoid killing.

384

### 385 **Fig 4. Oxidative pentose phosphate pathway is required for lamellocyte differentiation and** 386 **resistance.**

387 (A) Schematic representation of pentose phosphate pathway with metabolites in black and  
388 *Drosophila* genes encoding enzymes in blue. Genetic manipulations include hemocyte-specific  
389 RNAi of *Zw* induced by *Srp-Gal4* (*Srp>P{TRiP.HMC03068}attP2*; red lightning) and double null  
390 mutant in *Zw* and *Pgd* (*Pgd[n39] pn[1] Zw[lo2a]*; red crosses). (B) Efficiency of hemocyte-specific  
391 RNAi of *Zw* tested by RT-qPCR in hemocytes from uninfected (Uninf) and infected (INF) larvae 18  
392 hours after beginning of infection. Bars represent mean value of fold change compared to  
393 uninfected control samples (*Zw* expression levels normalized by *RpL32* expression in each

394 sample); dots represent individual samples, error bars represent  $\pm$  SEM, the control sample  
395 (*Srp> P{y[+t7.7]=CaryP}attP2*) was compared with RNAi (*Srp>P{TRiP.HMC03068}attP2*) using  
396 unpaired t test, asterisks indicate p value (\* P < 0.05, \*\* P < 0.01). (C) Number of hemocytes 22  
397 hours after beginning of infection in control (*Srp> P{y[+t7.7]=CaryP}attP2*), *Zw Pgd* null mutant  
398 (*Pgd[n39] pn[1] Zw[lo2a]*) and hemocyte-specific RNAi of *Zw* (*Srp>P{TRiP.HMC03068}attP2*).  
399 Each dot represents number of hemocytes in one larva, line represents the mean, samples were  
400 compared by unpaired t test, asterisks indicate p value (\* P < 0.05, \*\*\*\* P < 0.0001). (D) Survival  
401 of parasitoid wasp infection in control, null *Zw Pgd* mutant and hemocyte-specific RNAi of *Zw*.  
402 White bars show the percentage of surviving flies, grey bars the developing parasitoids and dark  
403 bars the dead pupae when neither fly nor parasitoid survived. Bars represent mean values; dots  
404 represent biological replicates, error bars represent  $\pm$  SEM; survival rates were compared using  
405 ordinary one-way ANOVA with multiple comparisons; asterisks indicate p value (\*\* P < 0.01, \*\*\*  
406 P < 0.001).

407

## 408 **Systemic trehalose metabolism and carbohydrates supply** 409 **to hemocytes are required for efficient immune response**

410 Metabolomics with the <sup>13</sup>C-labeled trehalose shows that trehalose is metabolized by infection-  
411 activated hemocytes. Therefore, we tested the importance of trehalose for the immune  
412 response. We first tested the hypomorphic mutation in trehalose-synthesizing gene *Tps1*  
413 (*Mi{y[+mDint2]=MIC}Tps1[MIO3087] / Tps1[d2]*). *Tps1* hypomorph have normal larval  
414 development with normal levels of glucose, glycogen and triglycerides but results in a reduction  
415 of trehalose levels to 20% of control [7]. The infected *Tps1* mutant differentiated significantly  
416 fewer lamellocytes than control larvae (Fig 5A). Similarly, a null mutant in the *Treh* gene  
417 (*Treh[cs1]*) with elevated trehalose, which cannot be converted to glucose either in the  
418 circulation or in the cells [21], also differentiated significantly fewer lamellocytes (Fig 5B). We  
419 verified that hemocytes from the *Treh[cs1]* mutant were unable to metabolize the <sup>13</sup>C-labeled  
420 trehalose supplied *ex vivo* (Fig 5C and S2 Table). These results demonstrate that trehalose is  
421 important for efficient lamellocyte differentiation.

422

### 423 **Fig 5. Effects of systemic carbohydrate metabolism and carbohydrate supply to hemocytes on** 424 **lamellocyte differentiation.**

425 (A) Number of lamellocytes 22 hours after beginning of infection in control (heterozygous  
426 *Mi{y[+mDint2]=MIC}Tps1[MIO3087] / +*) and hypomorphic *Tps1* mutant  
427 (*Mi{y[+mDint2]=MIC}Tps1[MIO3087] / Tps1[d2]*). Each dot represents number of hemocyte in  
428 one larva, line represents mean, samples were compared by unpaired t test, asterisks indicate p  
429 value (\*\*\*\* P < 0.0001). (B) Number of lamellocytes 22 hours after beginning of infection in  
430 control (heterozygous *Treh[cs1] / CyO Ubi-GFP*) and null *Treh* mutant (homozygous *Treh[cs1] /*  
431 *Treh[cs1]*). (C) Heat map of <sup>13</sup>C-labeled fraction of metabolites from control and null *Treh[cs1]*  
432 hemocytes in uninfected (Uninf) and infected (INF) conditions incubated *ex vivo* with labeled  
433  $\alpha,\alpha$ -trehalose-<sup>13</sup>C<sub>12</sub>. (D) Efficiency of hemocyte-specific RNAi of *Tret1-1* tested by RT-qPCR in  
434 hemocytes from uninfected and infected larvae 18 hours after beginning of infection. Box plots  
435 (median, 75th and 25th percentiles) show fold change compared to uninfected *Tret1-1-RA*  
436 control samples (expression levels were normalized by *RpL32* expression in each sample), each  
437 dot represents a biological replicate. Grey boxes represent control (*Srp> P{y[+t7.7]=CaryP}attP2*)

438 and red boxes hemocyte-specific *Tret1-1* RNAi (*Srp>P{TRiP.HMS02573}attP2*). Unpaired two-  
439 tailed t test was used to compare control with RNAi; asterisks indicate p value (\* P < 0.05, \*\* P <  
440 0.01, \*\*\*P < 0.001). (E) Fraction (%) of glucose-6-phosphate-<sup>13</sup>C<sub>n</sub> in hemocytes from uninfected  
441 larvae incubated *ex vivo* with labeled glucose (left bars) and from infected larvae incubated with  
442 labeled trehalose (right bars). Grey bars represent mean in control (*Srp>P{y[+t7.7]=CaryP}attP2*)  
443 and red bars mean in hemocyte-specific *Tret1-1* RNAi (*Srp>P{TRiP.HMS02573}attP2*). Unpaired  
444 two-tailed t test was used to compare control with RNAi; asterisks indicate p value (\*\* P < 0.01).  
445 (F) Number of lamellocytes 22 hours after beginning of infection in control (*Srp>*  
446 *P{y[+t7.7]=CaryP}attP2*) and in hemocyte-specific *Tret1-1* RNAi (*Srp>P{TRiP.HMS02573}attP2*).  
447 Each dot represents number of lamellocytes in one larva, line represents mean, samples were  
448 compared by unpaired t test, asterisks indicate p value (\*\*\* P < 0.001). (G) Number of  
449 lamellocytes 22 hours after beginning of infection in control (heterozygous *MFS3[CRISPR] Tret1-*  
450 *1[XCVI] / Cyo Ubi-GFP*) and in *MFS3 Tret1-1* double null mutant (*MFS3[CRISPR] Tret1-1[XCVI]*).  
451 Each dot represents number of lamellocytes in one larva, line represents mean, samples were  
452 compared by unpaired t test, asterisks indicate p value (\*\* P < 0.01). (H) Efficiency of hemocyte-  
453 specific RNAi of *Treh* tested by RT-qPCR in hemocytes from uninfected and infected larvae 18  
454 hours after beginning of infection. Box plots (median, 75th and 25th percentiles) show fold  
455 change compared to uninfected *c-Treh* control samples (expression levels were normalized by  
456 *RpL32* expression in each sample), each dot represents a biological replicate. Grey boxes  
457 represent control (*Srp>P{y[+t7.7]=CaryP}attP40*) and red boxes hemocyte-specific *Treh* RNAi  
458 (*Srp>P{TRiP.HMC03381}attP40*). Unpaired two-tailed t test was used to compare control with  
459 RNAi; asterisks indicate p value (\*\* P < 0.01, \*\*\*P < 0.001). (I) Number of lamellocytes 22 hours  
460 after beginning of infection in control (*Srp>P{y[+t7.7]=CaryP}attP40*) and in hemocyte-specific  
461 *Treh* RNAi (*Srp>P{TRiP.HMC03381}attP40*). Each dot represents number of lamellocytes in one  
462 larva, line represents mean, samples were compared by unpaired t test.

463

464 Next, we knocked down the *Tret1-1* transporter specifically in hemocytes (*Srp>Tret1-1-RNAi -*  
465 *P{TRiP.HMS02573}attP2*), which resulted in a reduction of *Tret1-1* expression upon infection to  
466 one-third compared to control (Fig 5D). Because knockdown did not prevent the increase in  
467 *Tret1-1* expression during infection (it only partially suppressed the increase), *ex vivo*  
468 metabolism of <sup>13</sup>C-labeled trehalose was only slightly reduced (as indicated by lower  
469 incorporation into G6P – Fig 5E and S2 Table), as was the number of lamellocytes (Fig 5F). Since  
470 *Tret1-1* knockdown did not substantially suppress trehalose uptake, we used a null mutant of  
471 *Tret1-1* together with a null mutation of *MFS3*. The double mutant *MFS3[CRISPR] Tret1-1[XCVI]*  
472 also significantly reduced the number of lamellocytes, but again only slightly (Fig 5G), suggesting  
473 that other highly expressed transporters are providing the carbohydrate supply.

474 We could not discriminate between glucose and trehalose metabolism in hemocytes by these  
475 manipulations. To test the importance of trehalose metabolism in hemocytes, we specifically  
476 knocked down *Treh* in hemocytes by *Srp*-driven RNAi, since the null mutant in *Treh* impairs  
477 systemic trehalose metabolism. As with *Tret1-1* knockdown, hemocyte specific knockdown of  
478 *Treh* reduced expression to one-third of the control, but did not prevent infection-induced  
479 increase in *Treh* expression (Fig 5H). Knockdown of *Treh* also did not affect the number of  
480 lamellocytes (Fig 5I); either because reduction of the increase by RNAi was not sufficient, or  
481 because trehalase activity is not required for lamellocytes differentiation, as suggested by the *c-*  
482 *Treh* expression in fully differentiated lamellocytes. Rather than attempt to resolve this issue,  
483 we decided to use a mitotic recombination strategy (see the last section of Results).

484 Since lamellocytes specifically increase the expression of cTreh, we tested the effect of specific  
485 mutations in the cytoplasmic version of Treh. The *Treh[c1]* mutation (S10 Fig) should block the  
486 utilization of trehalose inside the cells, but not disrupt trehalose-glucose metabolism in the  
487 circulation [21]. However, when we incubated *Treh[c1]* mutant hemocytes with 13C-labeled  
488 trehalose *ex vivo*, we did not observe any effect on trehalose metabolism in hemocytes (S10 Fig  
489 and S2 Table). The failure of the *Treh[c1]* mutation to block intracellular trehalose metabolism  
490 could be due to the second start codon in the cytoplasmic *Treh-RA/RD/RG/RE* transcripts (S10  
491 Fig). Therefore, we decided to remove both start codons by replacing 47 bases with a Gal4  
492 coding sequence (Fig 1 and S10). The resulting homozygous *Treh[RAΔGal4]* mutant shows a  
493 similar phenotype to the *Treh[c1]* mutant, with 20% lethality during pupal development and  
494 two-thirds of emerging adult flies dying within three days of eclosion in our *w<sup>1118</sup>* genetic  
495 background (data not shown). The *Treh[RAΔGal4]* mutant hemocytes still metabolized 13C-  
496 labeled trehalose almost normally (S10 Fig and S2 Table), and the mutation did not affect the  
497 number of lamellocytes (S10 Fig). Although the overall expression of *Treh* is reduced to one third  
498 in the uninfected *Treh[RAΔGal4]* mutant (S11 Fig), it is increased nine fold in the infected  
499 mutant (compared to a 25-fold increase in the wild type), indicating compensatory expression  
500 (S11 Fig). Using transcript-specific qPCR, we found that this compensatory expression occurs at  
501 the transcription start site common to both *Treh-RB* (cTreh) and *Treh-RC* (sTreh) transcripts (see  
502 S11 Fig for details). The strong increase in expression of cytoplasmic Treh as well as this  
503 compensatory expression in the *Treh[RAΔGal4]* mutant suggests that trehalase activity is very  
504 important in lamellocytes.

505

## 506 **Cell-autonomous role of trehalose in hemocytes**

507 Since we could not test the importance of trehalose metabolism in hemocytes with cTreh  
508 mutations, we decided to generate mitotic recombination clones [28] in the hematopoietic  
509 lineage with the *Treh[cs1]* mutation, which we verified as blocking trehalose metabolism (Fig  
510 5C). We recombined flippase (Flp) target site *FRT42D*, *Treh[cs1]* mutation and RFP marker on the  
511 second chromosome and crossed this line to flies with *FRT42D* and the GFP marker to generate  
512 heterozygous *FRT Treh[cs1] RFP / FRT GFP* flies (Fig 6A). The parental flies also carried *Srp-Gal4*  
513 and *UAS-Flp* on the third chromosomes, to induce mitotic recombination in the hematopoietic  
514 lineage of the progeny. Mitotic recombination resulted in RFP-labeled hemocytes with a  
515 *Treh[cs1]* null mutation and their GFP-labeled wild-type siblings (Fig 6A and 6B). When mitotic  
516 clones were first induced with only RFP and GFP markers without any mutation, the expected  
517 equal number of RFP and GFP sibling hemocytes was detected (Fig 6C), approximately 40% each  
518 (the remaining 20% were non-recombined GFP/RFP heterozygous hemocytes), demonstrating  
519 the efficiency of the method. A similar result was obtained in uninfected larvae with the  
520 *Treh[cs1]* mutation, although there was a minor increase in RFP-labeled hemocytes with the  
521 *Treh[cs1]* null mutation compared to GFP-labeled wild-type hemocytes (49% vs. 43%; Fig 6D).  
522 The observed difference could be due to the different genetic background of the chromosomal  
523 arms that become homozygous after recombination, not necessarily due to the lack of trehalase  
524 activity. A comparable result was obtained with lamellocytes from infected animals, where we  
525 found similar proportions of red and green cells - the small difference observed is consistent  
526 with the difference in uninfected larvae (Fig 6E). Generating clones with the *Treh[cs1]* null  
527 mutation did not change the total number of lamellocytes compared with larvae without  
528 induced recombination (Fig 6F). These results suggest that trehalase does not play an important,

529 cell-autonomous role, in lamellocyte differentiation, which is consistent with the expression of  
530 cytoplasmic trehalase only in fully differentiated lamellocytes (Fig 1H).

531

532 **Fig 6. Cell-autonomous role of trehalose metabolism in hemocytes.**

533 (A) Generation of hemocyte clones with null *Treh[cs1]* mutation by *Srp-Gal4 UAS-Flp* induced  
534 mitotic recombination - genotypes and color of parental and daughter cells after mitotic  
535 recombination (red: RFP-marked *Treh[cs1]* mutant clone, green: GFP-marked wild-type sister  
536 clone, yellow: RFP/GFP nonrecombinant heterozygous cell). (B) Red, green and yellow-marked  
537 hemocytes (both plasmatocytes and lamellocytes) upon mitotic recombination from infected  
538 larvae in circulation (left) and attached to parasitoid egg (right). Differential interference  
539 contrast (DIC) combined with fluorescence microscopy using 20x objective. (C) Percentage of  
540 red- and green-marked wild-type recombinant sister clone hemocytes and yellow-marked non-  
541 recombinant heterozygous hemocytes in uninfected control larvae without any mutation. (D)  
542 Percentage of red-marked *Treh[cs1]* mutant, green-marked wild-type sister clone hemocytes  
543 and yellow-marked non-recombinant heterozygous hemocytes in uninfected larvae. (E)  
544 Percentage of red-marked *Treh[cs1]* mutant lamellocytes, green-marked wild-type sister clone  
545 lamellocytes and yellow-marked non-recombinant heterozygous lamellocytes in infected larvae.  
546 (C-E) Bar represents mean percentage, dot represents counting from one larva, error bars  
547 represent  $\pm$  SEM; red and green samples were compared using unpaired two-tailed t test;  
548 asterisks indicate p value (\*  $P < 0.05$ ; ns = not significant). (F-H) Control individuals without  
549 recombination due to missing UAS-Flp (*FRT42D GFP / FRT42D Treh[cs1] RFP; Srp-Gal4 / +*;  
550 white/grey/black) compared to individuals with *Treh[cs1]* hemocyte mutant clones (*FRT42D GFP*  
551 */ FRT42D Treh[cs1] RFP; Srp-Gal4 / UAS-Flp*; purple). (F) Number of lamellocytes 22 hours after  
552 beginning of infection. Each dot represents number of lamellocytes in one larva, line represents  
553 mean, samples were compared by unpaired t test, no significant difference. (G) Percentage of  
554 surviving adult flies (marked fly), parasitoid wasp larvae, dead pupae (neither fly, nor parasitoid  
555 survived) and adult parasitoid wasp (marked wasp). Bars represent mean percentage, dots  
556 represent biological replicates, error bars represent  $\pm$  SEM, samples were compared by ordinary  
557 one-way ANOVA with Šidák's test for multiple comparisons, asterisks indicate p value (\*  $P <$   
558  $0.05$ ; \*\*  $P < 0.01$ , \*\*\* $P < 0.001$ ; ns = not significant). (H) Lifespan of females surviving infection  
559 (lines) and their daily average production of progeny (shaded area). Lifespan was tested by  
560 Gehan-Breslow-Wilcoxon test, median survival 48 days for control and 34 days for females with  
561 *Treh[cs1]* mutant clones ( $P = 0.0237$ ). Cumulative average progeny per female was 414 for  
562 control and 94 for females with *Treh[cs1]* mutant clones.

563

564 To test the effect on resistance, we used these larvae with almost half of the lamellocytes  
565 mutant for *Treh*. If trehalose metabolism in the lamellocytes was necessary for parasitoid killing,  
566 we would expect lower resistance. However, induction of *Treh[cs1]* mutant clones resulted in  
567 the opposite effect, with increased resistance compared to animals with the same genetic  
568 background in which clones were not induced due to the absence of Flp (S12 Fig). Although a  
569 relatively large variability was observed, the average percentage of surviving adult flies in  
570 controls was 18% and never exceeded 30%, whereas in flies with induced clones the average  
571 was 37% and reached up to 60% (Fig 6G). Subsequently, the percentage of surviving parasitoid  
572 wasps decreased from 65% in controls to 35% when clones were induced (Fig 6G). A possible  
573 explanation for these surprising results is that trehalose metabolism in fully differentiated  
574 lamellocytes is important for protecting the host from toxic reactions in the encapsulated egg.

575 Removing this ability in half of the lamellocytes could increase toxicity and thus resistance. To  
576 explore further, we looked at the lifespan of adult flies that survived the infection. Male lifespan  
577 was comparable (data not shown), however a greater number of females with induced clones  
578 died earlier than controls, with the median survival significantly reduced from 48 to 34 days,  
579 although the maximum lifespan was comparable (Fig 6H). A more pronounced effect was  
580 observed in the production of viable offspring: females with induced clones produced an  
581 average of only five viable offspring per female per day and ceased production after 26 days.  
582 Whereas, control females produced an average of 8-10 viable offspring per female per day  
583 throughout their lifespan (Fig 6H) - cumulatively, control females produced 4.4 times more  
584 offspring. It is important to note that verification of the link between the observed reduced  
585 fitness and possible increased toxicity during the larval immune response will require further  
586 detailed research.

587 In conclusion, we used mitotic clones to test the cell-autonomous role of trehalose metabolism  
588 in hemocytes and found that it is not required for lamellocyte differentiation or resistance.  
589 Removing the ability to metabolize trehalose in 40% of lamellocytes improved resistance but  
590 reduced the fitness of survivors.

591

## 592 Discussion

593 We previously demonstrated a systemic metabolic switch during infection of *Drosophila* larvae  
594 by parasitoid wasps, when sugar consumption in non-immune tissues is reduced to provide  
595 nutrients for the immune system [4]. We, and others, have also found a strong increase in the  
596 expression of the trehalose transporter *Tret1-1* and *Treh* in hemocytes during infection [4,8,9].  
597 This suggests that trehalose is likely an important carbohydrate source for privileged immune  
598 cells.

599 Analysis of transcriptional changes at single cell resolution suggested that larval hemocytes use  
600 lipids as the primary source to fuel the TCA cycle in the uninfected state [8]. However, half of the  
601 plasmatocytes in all cluster express *MFS3*, a functionally characterized glucose/trehalose  
602 transporter [20]; as well as the putative monosaccharide transporter *sut1* [9], suggesting that  
603 plasmatocytes also use glucose as a source to be metabolized in the PPP. While plasmatocytes  
604 may continue to utilize lipids during infection, as deduced from gene expression, lamellocytes  
605 strongly upregulate expression of several carbohydrate transporters and appear to rely much  
606 more on saccharides as a source [8]. Our bulk transcriptomic data are consistent with these  
607 findings, and <sup>13</sup>C-labeled carbohydrate tracing clearly supports these gene expression-based  
608 conclusions, showing that plasmatocytes from uninfected larvae do indeed metabolize glucose  
609 with a significant fraction metabolized in PPP.

610 The infection-induced increase in carbohydrate consumption by hemocytes is mediated by a  
611 marked increase in the expression of three other carbohydrate transporters besides *MFS3* and  
612 *sut1*. *Tret1-1*, like *MFS3*, is functionally characterized as a glucose and trehalose transporter  
613 [18]. The mild reduction in lamellocyte production even in the *Tret1-1 MFS3* double null mutant  
614 indicates that at least one other putative carbohydrate transporters: *sut1*, *CG4607*, or *CG1208*,  
615 which have yet to be functionally characterized, contributes to the glucose transport in  
616 hemocytes and is sufficient in the double mutant. Notably, increased carbohydrate supply  
617 during immune response is so critical that it is ensured by the expression of multiple  
618 redundantly functioning transporters (Fig 7). This redundancy in carbohydrate transporters  
619 means that knockout of a single, or even two transporters, has no serious impact on immune

620 response. However, the importance of carbohydrate supply to hemocytes is demonstrated as  
621 hemocyte-specific silencing of the oxidative PPP by Zw RNAi leads to almost no resistance. We  
622 have previously described the significance of a switch in systemic carbohydrate metabolism  
623 during the response. Here, we show that hemocytes indeed require carbohydrates for an  
624 effective response in order to fuel PPP.

625

626 **Fig 7. Scheme of hemocyte metabolism during the response to parasitoids and possible links**  
627 **to immune processes.**

628 Scheme showing hemocyte metabolism during parasitoid wasp infection. Metabolites,  
629 metabolic reactions/pathways and processes marked in black have been studied here, while  
630 possible links to other processes and pathways (discussed in the main text) are marked in grey.  
631 cTreh, cytoplasmic trehalase; GSH, reduced glutathione; GSSG, oxidized glutathione; PPP,  
632 pentose phosphate pathway; SAH, S-Adenosylhomocysteine; SAM, S-Adenosylmethionine;  
633 sTreh, secreted trehalase.

634

635 The different ways in which glucose is metabolized are determined by the actual needs of the  
636 cell (Fig 7 and [13]). If the cell primarily requires ATP, glucose is metabolized by glycolysis  
637 producing pyruvate, which can be further metabolized in the mitochondria, and ATP. If the main  
638 requirement of the cell is nucleotides (typically a proliferating cell), glucose is metabolized by  
639 non-oxidative PPP to form ribose-5-phosphate (bypassing NADPH production by oxidative PPP),  
640 which is further metabolized in the de novo synthesis of purines/pyrimidines. If the cell's  
641 primary need is NADPH, glucose is metabolized in cyclic PPP, where the ribose-5-phosphate  
642 produced by oxidative PPP is recycled back to G6P, which can enter further rounds of oxidation  
643 in PPP. The cell can combine these pathways to obtain the optimal ratio of ATP, NADPH,  
644 pyruvate, and pentoses.

645 Our 13C tracing shows that hemocytes from uninfected larvae metabolize predominantly  
646 glucose and very little trehalose. When infected, hemocytes increase glucose metabolism and  
647 additionally metabolize trehalose. Expression of cTreh indicates that only differentiated  
648 lamellocytes metabolize trehalose; and most likely also metabolize glucose - both MFS3 and  
649 Tret1-1 transport trehalose as well as glucose [18,20]. Thus, by tracing 13C-labeled trehalose,  
650 we can specifically monitor lamellocyte metabolism. It is important to note that we are  
651 observing the metabolism of a heterogeneous pool of hemocyte types, and some hemocytes  
652 may use only some of the pathways in which we see 13C labeling.

653 As summarized in the overall scheme (Fig 7), hemocytes, including lamellocytes, increase their  
654 rate of glycolysis and lactate production during infection. Our experiments showed no change in  
655 the amount of labeled glucose entering mitochondria, however mitochondrial metabolism can  
656 nevertheless be significantly altered during infection.. A significant amount of glucose is shunted  
657 into the PPP, both in the absence of infection and during infection. Our 13C tracing experiments  
658 show the partial labeling of G6P; this indicates that a significant fraction of hemocytes use cyclic  
659 PPP, including lamellocytes, as indicated by trehalose metabolism. Cyclic PPP reoxidizes G6P to  
660 generate the maximum amount of NADPH per glucose molecule [3]. A portion is returned to  
661 glycolysis at the glyceraldehyde-3P level from PPP, ultimately producing lactate. Some of the  
662 ribose-5P formed by oxidative PPP is diverted to de novo nucleotide synthesis. Thus, hemocytes,  
663 especially lamellocytes, couple NADPH production via cyclic PPP with *de novo* nucleotide  
664 synthesis and ATP production via downstream glycolysis. In addition, the specific pattern of

665 partial labeling of pentoses suggests that some hemocytes generate pentoses via non-oxidative  
666 PPP, both in the absence of infection and during infection.

667 Our <sup>13</sup>C tracing experiments and impaired resistance in *Zw*-deficient larvae indicate the  
668 importance of cyclic PPP in immune cells. Although the significance of NADPH production in  
669 activated immune cells, particularly in conjunction with oxidative burst, is well known [29], we  
670 are aware of only one study showing the importance of cyclic PPP in immunity, specifically in  
671 mammalian neutrophils [3]. Our findings providing evidence of the importance of cyclic PPP in  
672 invertebrate immune cells highlight its evolutionary significance. NADPH generated by cyclic PPP  
673 may serve a variety of purposes in immunity [29]. *Zw* null and RNAi animals show that  
674 oxidative/cyclic PPP is important for lamellocyte differentiation and for resistance (Fig 7). It is  
675 likely that NADPH is used during lamellocytes differentiation for reductive biosynthesis,  
676 associated with differentiation processes. For example, lamellocytes undergo significant changes  
677 in size, morphology, and adhesion capacity, to distinguish them from their precursors [30].  
678 Therefore, the use of NADPH in reductive biosynthesis of fatty acids and cholesterol can be  
679 hypothesized to play a key role in the remodeling of cell membranes during lamellocyte  
680 differentiation. In addition, there is a global change in gene expression [8,9] and thus a  
681 requirement for RNA synthesis. Consequently, ribose-5P generated by PPP is used for *de novo*  
682 nucleotide synthesis, as we observed by <sup>13</sup>C labeling in AMP/ADP/ATP. *De novo* synthesized ATP  
683 is also required for S-adenosylmethionine production and increased methylation pathway in  
684 activated immune cells [31]. Methylation of new molecules (e.g., newly synthesized proteins)  
685 may be important during lamellocyte differentiation, but homocysteine, a product of the  
686 methylation pathway, is also used in the transsulfuration pathway [32] to produce the  
687 antioxidants glutathione and taurine (see below).

688 Suppression of oxidative/cyclic PPP can also affect resistance. NADPH is needed to produce ROS  
689 and these are needed to kill the parasitoid. NADPH oxidase reduces oxygen to superoxide  
690 anions, which are subsequently dismutated to hydrogen peroxide [33]. Interestingly, Nappi and  
691 Vass detected hydrogen peroxide in plasmatocytes, which eventually attached to the egg, but  
692 not in lamellocytes [34]. This suggests that plasmatocytes use cyclic PPP to generate NADPH and  
693 hydrogen peroxide; although, our work does not exclude other sources of NADPH, such as  
694 isocitrate dehydrogenase and malic enzyme. Hydrogen peroxide can serve as a signal for further  
695 immune stimulation [35,36] or react with nitric oxide to form the hydroxyl radical, a very potent  
696 ROS [33]. Lamellocytes expressing the prophenoloxidase PPO3 and crystal cells expressing PPO2  
697 [37] produce additional toxic molecules associated with the melanization cascade, which again  
698 requires NADPH [12]. Lamellocyte-mediated encapsulation and melanization concentrate the  
699 toxic reaction within the capsule, which is crucial for resistance. Thus, NADPH produced by  
700 oxidative PPP may be required for resistance due to reductive biosynthesis during lamellocyte  
701 differentiation and encapsulation and due to the production of toxic molecules inside the  
702 capsule. To kill the parasitoid, the metabolic activities of different hemocytes need to be  
703 coordinated. Resolving these roles requires time-controlled genetic manipulation of cyclic PPP,  
704 ROS production and melanization cascade specific to the cell type in combination with, for  
705 example, genetically encoded metabolic sensors. Such manipulations would make a model of  
706 the *Drosophila* response to a parasitoid wasp infection an invaluable tool for investigating the  
707 role of cyclic PPP in immunity.

708 Trehalose is specifically metabolized by lamellocytes because they express cytoplasmic  
709 trehalase. The compensatory expression of an alternative transcript in a mutant of *cTreh* raises  
710 the question of why the capacity to metabolize trehalose is so important in lamellocytes. While



711 systemic metabolism of trehalose is necessary for efficient lamellocyte differentiation,  
712 metabolism of trehalose within differentiating hemocytes is not. Thus, trehalose in the  
713 circulation appears to be important for maintaining adequate glucose levels [7] for  
714 differentiating hemocytes. Based on the expression of cTreh, trehalose is only metabolized by  
715 fully differentiated lamellocytes in a cyclic PPP, i.e. generating NADPH. Survival rate of  
716 individuals with almost half of their hemocytes mutant for *Treh* is rather increased compared to  
717 controls. Thus, trehalose metabolism in hemocytes does not appear to be important for  
718 resistance mechanisms. Encapsulation and melanization are thought to play a role not only in  
719 killing the pathogen, but also in protecting the host from its own toxic immune reaction [12].  
720 Based on our results, we propose that trehalose metabolism in lamellocytes may play a specific  
721 role in protecting the host: (1) Trehalose is metabolized by cyclic PPP, which generates NADPH.  
722 NADPH is required for the reduction of GSSG to GSH, which we observed to increase in  
723 hemocytes after infection. Most hemocytes highly express genes of the thioredoxin system, but  
724 according to scRNAseq studies [8,9], lamellocytes show an even stronger expression. The  
725 thioredoxin system produces antioxidants, including GSH. However, it is important to add that  
726 we do not provide direct evidence that lamellocytes specifically are responsible for the observed  
727 increase in antioxidants. (2) Larvae with half of their hemocytes deficient in *Treh* are in fact  
728 more resistant than controls, however surviving adults show reduced fitness. This suggests that  
729 trehalose metabolism in cyclic PPP is important specifically for antioxidant production and thus  
730 host protection from the toxic reaction occurring within the melanizing capsule. Reducing this  
731 protection could increase the toxicity of the reaction, leading to the observed increased  
732 resistance, but also harming the host. This could manifest itself in a number of ways, such as the  
733 observed reduced production of viable offspring by surviving females. Molina-Cruz et al. showed  
734 that mosquito strains with higher ROS levels survived bacterial and Plasmodium infections at a  
735 higher rate, while dietary antioxidant supplementation reduced resistance[38]. Interestingly, the  
736 same antioxidants also significantly improved age-related loss of fecundity in mosquitoes [39]. It  
737 is important to emphasize that we do not know whether the observed reduced fitness is directly  
738 caused by increased toxicity during the larval immune response. Further studies are needed to  
739 verify the connection between trehalose metabolism in cyclic PPP in lamellocytes and the  
740 production of antioxidants to protect the host while responding to the parasitoid.

741 In summary, an effective immune response to parasitoid wasp infection requires rapid and  
742 coordinated hemocyte activity, which includes lamellocyte differentiation. Additionally, capsule  
743 formation around the parasitoid egg is required, associated with a melanization cascade, and  
744 thus production of toxic molecules within the capsule. Lastly, protection of the host cavity from  
745 this toxic reaction is required for host survival. All these actions require changes in carbohydrate  
746 metabolism in hemocytes (Fig 7). Here we show that systemic trehalose metabolism, including  
747 synthesis by *Tps1* and conversion to glucose by *Treh*, is essential for adequate carbohydrate  
748 supply to hemocytes during infection, for lamellocyte differentiation and resistance. Hemocyte  
749 supply is ensured by the expression of several carbohydrate transporters. While glucose is  
750 generally metabolized by hemocytes, trehalose is specifically metabolized only within  
751 lamellocytes by cytoplasmic trehalase. Here, we demonstrate that both glucose and trehalose  
752 are metabolized by PPP, and in particular by cyclic PPP, which oxidizes G6P in multiple rounds to  
753 maximize NADPH production. PPP also connects to downstream glycolysis, which produces ATP  
754 and ends with the release of lactate. PPP and its connections to several metabolic pathways  
755 support various activities required in the response to parasitoids. (1) We have shown that  
756 oxidative PPP is required for lamellocyte differentiation, implicating a role for NADPH in  
757 reductive biosynthesis, for example in membrane remodeling. Differentiation could also be

758 promoted by ribose-5P associated with nucleotide synthesis, which is required for broad  
759 changes in gene expression (new RNA and methylation). (2) We have shown that oxidative PPP  
760 is required for resistance, which likely involves a role of NADPH in the melanization cascade and  
761 in the ROS production, both required for pathogen killing. (3) We observed increased production  
762 of the antioxidants glutathione and taurine, which requires NADPH/Trxr1-mediated reduction of  
763 GSSG to GSH and could also be promoted by coupling PPP-produced ribose-5P to the ATP-SAM-  
764 homocysteine-transsulfuration pathway. Antioxidants could explain the observed effects on the  
765 reduced fitness of trehalase knockout in hemocyte clones. Nevertheless, the potential link  
766 between sugars metabolized in PPP and host protective mechanisms requires further work, such  
767 as manipulating the thioredoxin system specifically in fully differentiated lamellocytes and  
768 studying the effects on larvae as well as development and physiology of surviving animals. It is  
769 difficult to separate resistance mechanisms from host protection when, for example, NADPH  
770 produced by cyclic PPP appears to be required for both. At first, we were surprised that  
771 although trehalose metabolism seems to be important in hemocytes, we did not observe any  
772 effect on resistance. However, from the evolutionary perspective, protecting the host from its  
773 own immune response is no less important and probably no less energetically demanding. In the  
774 long term, the trade-off between higher survival and lower reproductive fitness may be of great  
775 evolutionary importance.

776

## 777 **Materials and methods**

778

### 779 **Fly strains and cultivation**

780 *Drosophila melanogaster* strain  $w^{1118}$  (FBal0018186) in Canton S genetic background  
781 (FBst0064349) was used as a control line unless otherwise stated. Strains  $Pgd^{n39} pn^1 Zw^{lo2a}$   
782 (FBst0006033), UAS-Zw-RNAi  $Zw^{HMC03068}$  (FBal0292280), UAS-Tret1-1-RNAi  $Tret1-1^{HMS02573}$   
783 (FBal0281575), UAS-Treh-RNAi  $Treh^{HMC03381}$  (FBal0292531) and control lines for RNAi  $y^1 v^1$ ;  
784  $P\{CaryP\}attP2$  (FBst0036303) and  $y^1 v^1$ ;  $P\{CaryP\}Msp300attP40$  (FBst0036304) were obtained  
785 from the Bloomington Drosophila Stock Center. Strains  $Treh^{c1}$  (FBal0321693),  $Treh^{cs1}$   
786 (FBal0321690),  $Tps1^{MI03087}$  (FBal0260512) and  $Tps1^{d2}$  (FBal0302039) were obtained from T.  
787 Nishimura,  $MFS3^{CRISPR}$  (FBal0366542) and  $Tret1-1^{XCVI}$  (FBal0319692) were obtained from S.  
788 Schirmeier. The  $SrpD-Gal4$  strain (FBtp0020112) was obtained from M. Crozatier, backcrossed  
789 into the  $w^{1118}$  background, and recombined with  $P\{tubP-GAL80ts\}2$  (FBti0027797), which was  
790 also backcrossed into  $w^{1118}$  background, to generate the  $w^{1118}; +/+; SrpD-Gal4 P\{tubP-GAL80ts\}2$   
791 line with Gal4 expression in all hemocytes but very low expression in the fat body at 25°C  
792 (expression in the fat body is only present at 29°C in this line). Line  $w^{1118};$   
793  $P\{ry[+t7.2]=neoFRT\}42D$ ,  $Treh^{cs1}$ ,  $P\{w[+mC]=Ubi-mRFP.nls\}2R / CyO$ ;  $SrpD-Gal4 / TM6B$  was  
794 generated by recombination of  $P\{ry[+t7.2]=neoFRT\}42D P\{w[+mC]=Ubi-mRFP.nls\}2R$   
795 (FBst0035496) with  $Treh^{cs1}$  and by crossing to  $SrpD-Gal4$ . Line  $w^{1118}; P\{ry[+t7.2]=neoFRT\}42D$ ,  
796  $P\{w[+mC]=Ubi-GFP.nls\}2R1 P\{Ubi-GFP.nls\}2R2 / CyO$ ;  $P\{y[+t7.7] w[+mC]=20XUAS-$   
797  $FLPD5.PEST\}attP2 / TM6B$  was generated by recombination of  $P\{FRT(whs)\}G13 P\{Ubi-$   
798  $GFP.nls\}2R1 P\{Ubi-GFP.nls\}2R2$  (FBst0005826) with  $P\{ry[+t7.2]=neoFRT\}42D$  (FBti0141188) and  
799 by crossing to  $P\{y[+t7.7] w[+mC]=20XUAS-FLPD5.PEST\}attP2$  (FBti0161054). All flies were grown  
800 on cornmeal medium (8% cornmeal, 5% glucose, 4% yeast, 1% agar, 0.16% methylparaben) at  
801 25°C.

802

## 803 **Generation of *Treh*[*RAΔG4*] mutant**

804 CRISPR-mediated mutagenesis was performed by WellGenetics Inc. using modified methods of  
805 Kondo and Ueda [40]. In brief, the gRNA sequence TGATTGCTCGATGGATTGCG[TGG] was cloned  
806 into U6 promoter plasmid. Cassette *attP-Gal4-3xP3-RFP*, which contains attP, Gal4, RBS and a  
807 floxed 3xP3-RFP, and two homology arms were cloned into pUC57-Kan as donor template for  
808 repair. *Treh*-targeting gRNAs and hs-Cas9 were supplied in DNA plasmids, together with donor  
809 plasmid for microinjection into embryos of control strain *w<sup>1118</sup>*. F1 flies carrying selection marker  
810 of 3xP3-RFP were further validated by genomic PCR and sequencing. CRISPR generates a 47-bp  
811 deletion allele of *Treh* and is replaced by cassette attP-Gal4-3xP3-RFP (Fig 1). The line is depicted  
812 here as *Treh<sup>RAΔG4</sup>*. *Treh<sup>RAΔG4</sup>* was 10 times backcrossed to our control *w<sup>1118</sup>* genetic background.

813

## 814 **Parasitoid wasp infection**

815 Parasitoid wasps *Leptopilina boulardi* were reared on sugar agar medium (6% sucrose, 1.5%  
816 agar, 0.75% methylparaben) and grown by infection of wild-type *Drosophila* larvae. Early third  
817 instar larvae (72 hours after egg laying) were infected with parasitoid wasps (= time point 0  
818 hours). Weak infection (1-2 eggs per larva) was used for resistance and survival analysis. Strong  
819 infection (4-8 eggs per larva) was used for the rest of the experiments to obtain a strong and  
820 more uniform immune response. Infections were performed on 60-mm Petri dishes with  
821 standard cornmeal medium for 15 minutes with periodic interruption of infecting wasps for  
822 weak infection and 45 minutes for strong infection.

823

## 824 **Hemocyte counting**

825 Hemocytes were obtained from larvae by cuticle tearing of one larva in 15 μl PBS and counted  
826 based on morphology in Neubauer hemocytometer (Brand GMBH) using differential  
827 interference contrast microscopy.

828

## 829 **Resistance, survival and fitness analysis**

830 To determine survival and parasitoid resistance rates, infected/control larvae were placed in  
831 fresh vials (typical 1 experiment = 30 larvae/vial and 3 vials/genotype in 3 independent  
832 biological replicates of infection). To determine resistance, pupae were dissected 4 days after  
833 infection to count melanized wasp eggs (winning host kills pathogen) or surviving wasp larvae  
834 (winning parasitoid). For the survival experiment, emerged adult flies were counted as survivors  
835 of infection excluding flies without melanized capsule (if no melanized capsule was visible in the  
836 abdomen, the fly was dissected). Adult wasps that emerged from pupae were counted as adult  
837 winning parasitoids. The lifespan of surviving infected flies was determined by transferring flies  
838 to a fresh vial (20 flies per vial) every 2 to 3 days and counting the days until death. Fitness was  
839 determined for flies that survived infection by leaving at least 5 males with at least 5 females  
840 (maximum 10 females per vial) in a vial, transferring them to a fresh vial every 2 to 3 days, and  
841 counting the number of offspring pupae throughout their lifetime.

842

## 843 Gene expression analysis

844 Hemolymph was collected by rupturing 50 larvae in 2  $\mu$ l of PBS on a microscope slide on ice, the  
845 hemolymph was transferred into 200  $\mu$ l of Trizol reagent (Ambion), homogenized using a plastic  
846 motorized pestle, incubated for 15 min at room temperature and either frozen at -80°C or  
847 directly followed by RNA isolation using a Direct-zol RNA microprep kit (Zymo Research)  
848 according to the manufacturer's protocol. Reverse transcription was performed using  
849 PrimeScript reverse transcriptase (Takara) and gene expression was analyzed using the TP SYBR  
850 2x mastermix (TopBio) on a CFX 1000 Touch Real time cycler (BioRad). Expression of a specific  
851 gene in each sample was normalized to expression of *RpL32* (FBgn0002626).

852

853 Primers:

| Gene<br>(FlyBase ID)            | Primer    | Sequence 5'- 3'         |
|---------------------------------|-----------|-------------------------|
| <i>Treh</i><br>(FBgn0003748)    | cTreh-F   | CGAGCAATCACAAAATGAACGG  |
|                                 | sTreh-F   | CGACTATAACAATGCCATTCCCG |
|                                 | Treh-R    | CTGATTCTTGGCCTCCATCATG  |
|                                 | Treh-F1   | CAATCATTCCCGTGCCAAATC   |
|                                 | Treh-R1   | CCACGTACGACTTGACCATAC   |
|                                 | Treh-RB-F | CTGGTGCACAAAACAATACAGAT |
|                                 | Treh-R2   | TTTGGATGGTGTGCAGCAGATT  |
| <i>Tret1-1</i><br>(FBgn0050035) | Tret-RA-F | ACAAACTTCCCGAGGAAAACCT  |
|                                 | Tret-RA-R | CACACGATGATAGCCCAGCT    |
|                                 | Tret-RB-F | CACCGCGATGAAGATCCTGA    |
|                                 | Tret-RB-R | TGATGCCACCAACCCAAGAA    |
| <i>Zw</i><br>(FBgn0004057)      | Zw-F      | GATAGCATCAAGGAGCAGTGT   |
|                                 | Zw-R      | GCCTTGTTCTTGTCTCCATAATC |
| <i>RpL32</i><br>(FBgn0002626)   | RpL32-F   | AAGCTGTTCGCACAAATGGCG   |
|                                 | RpL32-R   | GCACGTTGTGCACCAGGAAC    |

854

855

## 856 Bulk RNAseq analysis

857 RNA was extracted from circulating hemocytes (72 hours after egg laying = time of infection = 0  
858 hours, 81 hours after egg laying = 9 hours post infection/hpi and 90 hours after egg laying = 18  
859 hpi), from lymph glands (9 and 18 hpi) and from wing discs (9 hpi) of uninfected and infected  
860 third instar *w<sup>1118</sup>* larvae. Circulating hemocytes were obtained by ripping 100 larvae in ice-cold  
861 PBS directly into 1.5 mL centrifuge Eppendorf tubes, centrifuging 5 min at 360xg, removing the  
862 supernatant, and isolating RNA using Trizol reagent (200  $\mu$ L) (Ambion) according to the  
863 manufacturer's protocol. Lymph glands and wing discs were dissected from larvae in ice-cold

864 PBS, transferred to 1.5 mL centrifuge Eppendorf tubes with Trizol (200  $\mu$ L) reagent (Ambion),  
865 homogenized using a plastic motorized pestle, followed by Direct-zol RNA microprep kit (Zymo  
866 Research) according to protocol. Frozen total RNA samples were sent to the Genomics Core  
867 Facility (EMBL Heidelberg) for preparation of barcoded 3'-end seq forward libraries, followed by  
868 deep uni-directional sequencing of 75-base long reads using Illumina NextSeq. Trimmed reads in  
869 Fastq files were mapped to the BDGP *Drosophila melanogaster* Release 6.29 genomic sequence  
870 using the Mapper for RNA Seq in Geneious prime software (Biomatters). Normalized counts of  
871 reads mapped to each gene annotation were calculated as transcripts per million (TPM),  
872 expression levels were compared using the DESeq2 method in Geneious prime software, and  
873 data were exported to an Excel file (S1 Table).

874

## 875 **Metabolomics and stable $^{13}\text{C}$ isotope tracing**

876  $^{13}\text{C}$ -labeled glucose feeding.  $^{13}\text{C}$ -labeled glucose (D-Glucose- $^{13}\text{C}_6$  isotope purity  $\geq 99$  atom %  $^{13}\text{C}$   
877 - Sigma-Aldrich) was added to the semi-defined diet (per 100 ml: 0.62 g of agar, 8 g of brewer's  
878 yeast, 2 g of yeast extract, 2 g of peptone, 3 g of sucrose, 3 g of unlabeled glucose, 0.05 g of  
879  $\text{MgSO}_4 \times 6\text{H}_2\text{O}$ , 0.05 g of  $\text{CaCl}_2 \times 2\text{H}_2\text{O}$ , 600  $\mu$ l of propionic acid, 1 ml of 10% p-hydroxy-benzoic  
880 acid methyl ester in 95% ethanol). The diet mixture was brought to a boil, then cooled to 50-  
881 60°C with stirring and p-hydroxy-benzoic acid and propionic acid were added. 2 ml of medium  
882 was taken into a Falcon tube and 100  $\mu$ l of  $^{13}\text{C}$ -labeled glucose (600 mg/ml) was added (50% of  
883 the glucose in the diet was labeled). 1 ml of diet was poured into a glass vial. 100 uninfected or  
884 infected larvae (16 hours after the start of infection) were placed in the vial for 6 hours. The  
885 larvae were then removed from the vial, washed twice in water and once in PBS and placed on a  
886 microscope slide covered with parafilm, and the PBS residue was removed with filter paper. 4  $\mu$ l  
887 of PBS was added to the larvae and each larva was ruptured, 20  $\mu$ l of hemolymph was collected  
888 and transferred to sterile 1.5 ml Eppendorf polypropylene centrifuge tubes with 60  $\mu$ l of PBS.  
889 Larvae were washed with an additional 25  $\mu$ l of fresh PBS and 20  $\mu$ l was recovered in the same  
890 tubes. Samples were centrifuged for 5 minutes at 360xg. 95  $\mu$ l of supernatant (with extracellular  
891 metabolites) was removed, 380  $\mu$ l of cold acetonitrile-methanol (1:1) extraction buffer was  
892 added and placed in liquid nitrogen. To collect metabolites from pelleted hemocytes, 50  $\mu$ l of  
893 water was added, frozen in liquid nitrogen/thawed at 37°C three times (to disrupt the rigid cells  
894 of hemocytes), then 200  $\mu$ l of cold acetonitrile-methanol (1:1) was added and stored at -80°C  
895 until LC-HRMS analysis.

896 Ex vivo hemocyte incubation with  $^{13}\text{C}$ -labeled glucose and trehalose. Larvae were washed first  
897 with distilled water and then with PBS to reduce contamination. Larval hemolymph was  
898 collected by carefully tearing the larvae on a glass microscope slide covered with parafilm.  
899 Hemolymph from 50 larvae was immediately collected into sterile 1.5 ml Eppendorf  
900 polypropylene centrifuge tubes prefilled with 100  $\mu$ l PBS and centrifuged for 5 min at 25°C,  
901 360xg. The supernatant was then removed and the cells were mixed with labeled medium (5mM  
902  $^{13}\text{C}_{12}$  labeled or unlabeled trehalose, 0.5mM  $^{13}\text{C}_6$  labeled or unlabeled glucose, 5mM proline,  
903 0.3mM methionine and 5mM glutamine, all reagents from Sigma/Merck,) supplemented with  
904 gentamicin (10 mg/ml; Gibco), amphotericin B (250  $\mu$ g/ml; Gibco) and 0.1 mM phenylthiourea  
905 (PTU; Sigma/Merck) to prevent melanization. The hemocytes were then incubated for 40 min at  
906 25°C and 80-90% humidity. The cells were then centrifuged for 5 min at 25°C, 360xg, the  
907 supernatant was removed, the cells were mixed with 50  $\mu$ l of cold PBS and frozen in liquid  
908 nitrogen/thawed at 37°C three times (to disrupt the rigid hemocyte cells). Finally, 200  $\mu$ l of cold  
909 acetonitrile-methanol (1:1) was added and samples were stored at -80°C until LC-HRMS analysis.

910 Frozen samples were melted on ice, then internal standards, p-fluoro-DL-phenylalanine (Sigma-  
911 Aldrich, Saint Luis, MI, USA) was added to the extraction buffer, both at a final concentration of  
912 200 nmol/mL. Samples were homogenized using a TissueLyser LT (Qiagen, Hilden, Germany) set  
913 to 50 Hz for 5 min (with a rotor pre-chilled to  $-20^{\circ}\text{C}$ ). Homogenization and centrifugation (at 20  
914 000 $\times$ g for 5 min at  $4^{\circ}\text{C}$ ) was repeated twice and the two supernatants were combined. Samples  
915 were analyzed by a high-resolution mass spectrometer (Orbitrap-Q Exactive Plus ) coupled to a  
916 Dionex Ultimate 3000 liquid chromatograph and a Dionex open autosampler (all from  
917 ThermoFisher Scientific, Waltham, MA, USA) as previously described [41]. Data were acquired  
918 and metabolites identified using an in-house Metabolite Mapper platform equipped with an  
919 internal metabolite database in conjunction with Xcalibur™ software (v4.0, ThermoFisher  
920 Scientific, Waltham, MA, USA). All metabolites were quantified relatively using the areas under  
921 respective chromatographic peaks. The data were normalized to the total content of all  
922 screened unlabeled metabolites - the peak area of the metabolite in a particular sample was  
923 divided by the peak area of the same metabolite of the selected reference sample and this  
924 procedure was repeated for each individual unlabeled metabolite. These ratios of all  
925 metabolites in one particular sample were averaged to determine a normalization factor. We  
926 then divided the measured peak area by the normalization factor for that sample to obtain the  
927 normalized peak area values (S2 Table).

928

## 929 **Generation of hemocyte mutant clones by mitotic** 930 **recombination**

931 The *FRT RFP; SrpD-Gal4* control line ( $w^{1118}; P\{ry[+t7.2]=neoFRT\}42D, P\{w[+mC]=Ubi-mRFP.nls\}2R$   
932  $/ CyO; SrpD-Gal4 / TM6B$ ) or the *FRT Treh<sup>cs1</sup> RFP; SrpD-Gal4* mutant line ( $w^{1118};$   
933  $P\{ry[+t7.2]=neoFRT\}42D, Treh^{cs1}, P\{w[+mC]=Ubi-mRFP.nls\}2R / CyO; SrpD-Gal4 / TM6B$ ) were  
934 crossed with either flippase-free *FRT GFP* line ( $w^{1118}; P\{ry[+t7.2]=neoFRT\}42D, P\{w[+mC]=Ubi-$   
935  $GFP.nls\}2R1 P\{Ubi-GFP.nls\}2R2 / CyO$ ) as control without clone induction or with *FRT GFP; UAS-*  
936 *Flp* line ( $w^{1118}; P\{ry[+t7.2]=neoFRT\}42D, P\{w[+mC]=Ubi-GFP.nls\}2R1 P\{Ubi-GFP.nls\}2R2 / CyO;$   
937  $P\{y[+t7.7] w[+mC]=20XUAS-FLPD5.PEST\}attP2 / TM6B$ ) to induce mitotic clonal recombination in  
938 hemocytes by expressing flippase using *SrpD-Gal4* driver. Larvae with ubiquitous red and green  
939 fluorescence, i.e. without balancers, were selected and dissected in PBS on a microscope slide to  
940 obtain hemocytes. Images of hemocytes were taken using red and green fluorescence and  
941 differential interference contrast microscopy. Merged images were used to count green, red and  
942 heterozygous yellow hemocytes.

943

## 944 **Immunohistochemistry**

945 The central nervous system of infected and non-infected third instar larvae were dissected and  
946 stained according to standard protocols. The following primary antibodies were used: GFP anti-  
947 chicken (Abcam, 1:1000), Rabbit anti-Rumpel (1:500; [42]), Elav anti-rat and Repo anti-mouse  
948 (Developmental Studies Hybridoma Bank, 1:5), Tret1-1 anti-guinea pig, 1:50; [43]). All secondary  
949 antibodies conjugated to Alexa Fluor 488, Alexa Fluor 568 or Alexa Fluor 647 were used at a  
950 ratio of 1:1000 (Thermo Fisher Scientific). Confocal images were obtained using a Zeiss LSM 880  
951 (Zeiss, Oberkochen, Germany) and analyzed using Fiji [44].

952

## 953 Data analysis

954 Data were analyzed and graphed using GraphPad Prism (GraphPad Software), with specific  
955 statistical tests shown in the legend of each figure.

956

## 957 Acknowledgments

958 The authors acknowledge funding from the Grant Agency of the Czech Republic to TD (Project  
959 20-09103S; [www.gacr.cz](http://www.gacr.cz)) and from the European Union's Horizon 2020 research and innovation  
960 programme under the Marie Skłodowska-Curie grant agreement No 867430 to MK  
961 (IMMUNETREH). We thank Dr. Takashi Nishimura, Dr. Stefanie Schirmeier, Michele Crozatier and  
962 Bloomington Drosophila Stock Center for fly and wasp stocks. We thank to Lucie Hrádková for  
963 laboratory management and Marcela Jungwirthová for project management, and all members  
964 of Doležal and Šimek laboratories for their help with work. We thank Dr. Vladimír Beneš and  
965 Genomics Core Facility (EMBL Heidelberg, Germany) for RNAseq services and WellGenetics Inc.  
966 (New Taipei City, Taiwan) for CRISPR-mediated mutagenesis. We thank Dr. Jason Tennessen for  
967 advice on metabolomics.

968

## 969 References

- 970 1. O'Neill LAJ, Kishton RJ, Rathmell J. A guide to immunometabolism for immunologists.  
971 Nature Reviews Immunology. 2016;16: 553–565. doi:10.1038/nri.2016.70
- 972 2. Krejčová G, Danielová A, Nedbalová P, Kazek M, Strych L, Chawla G, et al. *Drosophila*  
973 macrophages switch to aerobic glycolysis to mount effective antibacterial defense.  
974 Banerjee U, Banerjee U, Theopold U, editors. eLife. 2019;8: e50414.  
975 doi:10.7554/eLife.50414
- 976 3. Britt EC, Lika J, Giese MA, Schoen TJ, Seim GL, Huang Z, et al. Switching to the cyclic  
977 pentose phosphate pathway powers the oxidative burst in activated neutrophils. Nature  
978 Metabolism. 2022;4: 389–403. doi:10.1038/s42255-022-00550-8
- 979 4. Bajgar A, Kucerova K, Jonatova L, Tomcala A, Schneedorferova I, Okrouhlik J, et al.  
980 Extracellular adenosine mediates a systemic metabolic switch during immune response.  
981 PLoS Biology. 2015;13: e1002135.
- 982 5. Thompson SN. Trehalose – The Insect 'Blood' Sugar. Advances in Insect Physiology.  
983 Elsevier; 2003. pp. 205–285. doi:10.1016/S0065-2806(03)31004-5
- 984 6. Ugrankar R, Theodoropoulos P, Akdemir F, Henne WM, Graff JM. Circulating glucose levels  
985 inversely correlate with *Drosophila* larval feeding through insulin signaling and SLC5A11.  
986 Commun Biol. 2018;1. doi:10.1038/s42003-018-0109-4
- 987 7. Matsushita R, Nishimura T. Trehalose metabolism confers developmental robustness and  
988 stability in *Drosophila* by regulating glucose homeostasis. Communications Biology.  
989 2020;3. doi:10.1038/s42003-020-0889-1
- 990 8. Cattenoz PB, Sakr R, Pavlidaki A, Delaporte C, Riba A, Molina N, et al. Temporal specificity  
991 and heterogeneity of *Drosophila* immune cells. The EMBO Journal. 2020;39.  
992 doi:10.15252/embj.2020104486

- 993 9. Tattikota SG, Cho B, Liu Y, Hu Y, Barrera V, Steinbaugh MJ, et al. A single-cell survey of  
994 *Drosophila* blood. Lemaître B, Akhmanova A, Lemaître B, editors. *eLife*. 2020;9: e54818.  
995 doi:10.7554/eLife.54818
- 996 10. Zhang Y, Wang F, Feng Q, Wang H, Tang T, Huang D, et al. Involvement of trehalose-6-  
997 phosphate synthase in innate immunity of *Musca domestica*. *Developmental &*  
998 *Comparative Immunology*. 2019;91: 85–92. doi:10.1016/j.dci.2018.10.010
- 999 11. Russo J, Dupas S, Frey F, Carton Y, Brehelin M. Insect immunity: early events in the  
1000 encapsulation process of parasitoid (*Leptopilina boulardi*) eggs in resistant and susceptible  
1001 strains of *Drosophila*. *Parasitology*. 1996;112: 135–142. doi:10.1017/S0031182000065173
- 1002 12. Nappi AJ, Christensen BM. Melanogenesis and associated cytotoxic reactions: Applications  
1003 to insect innate immunity. *Insect Biochemistry and Molecular Biology*. 2005;35: 443–459.  
1004 doi:10.1016/j.ibmb.2005.01.014
- 1005 13. Stincone A, Prigione A, Cramer T, Wamelink MMC, Campbell K, Cheung E, et al. The return  
1006 of metabolism: biochemistry and physiology of the pentose phosphate pathway. *Biological*  
1007 *Reviews*. 2015;90: 927–963. doi:10.1111/brv.12140
- 1008 14. Ghergurovich JM, García-Cañaveras JC, Wang J, Schmidt E, Zhang Z, TeSlaa T, et al. A small  
1009 molecule G6PD inhibitor reveals immune dependence on pentose phosphate pathway. *Nat*  
1010 *Chem Biol*. 2020;16: 731–739. doi:10.1038/s41589-020-0533-x
- 1011 15. Perl A. Review: Metabolic Control of Immune System Activation in Rheumatic Diseases.  
1012 *Arthritis & Rheumatology*. 2017;69: 2259–2270. doi:10.1002/art.40223
- 1013 16. Dolezal T. Adenosine: a selfish-immunity signal? *Oncotarget*. 2015;6: 32307–32308.
- 1014 17. Cox JE, Thummel CS, Tennessen JM. Metabolomic Studies in *Drosophila*. *Genetics*.  
1015 2017;206: 1169–1185. doi:10.1534/genetics.117.200014
- 1016 18. Hertenstein H, McMullen E, Weiler A, Volkenhoff A, Becker HM, Schirmeier S. Starvation-  
1017 induced regulation of carbohydrate transport at the blood–brain barrier is TGF- $\beta$ -signaling  
1018 dependent. VijayRaghavan K, editor. *eLife*. 2021;10: e62503. doi:10.7554/eLife.62503
- 1019 19. Francis D, Ghazanfar S, Havula E, Krycer JR, Strbenac D, Senior A, et al. Genome-wide  
1020 analysis in *Drosophila* reveals diet-by-gene interactions and uncovers diet-responsive  
1021 genes. Kulathinal R, editor. *G3 Genes|Genomes|Genetics*. 2021;11.  
1022 doi:10.1093/g3journal/jkab171
- 1023 20. McMullen E, Weiler A, Becker HM, Schirmeier S. Plasticity of Carbohydrate Transport at  
1024 the Blood-Brain Barrier. *Frontiers in Behavioral Neuroscience*. 2021;14. Available:  
1025 <https://www.frontiersin.org/articles/10.3389/fnbeh.2020.612430>
- 1026 21. Yoshida M, Matsuda H, Kubo H, Nishimura T. Molecular characterization of *Tps1* and *Treh*  
1027 genes in *Drosophila* and their role in body water homeostasis. *Sci Rep*. 2016;6.  
1028 doi:10.1038/srep30582
- 1029 22. Dick TP, Ralser M. Metabolic Remodeling in Times of Stress: Who Shoots Faster than His  
1030 Shadow? *Molecular Cell*. 2015;59: 519–521. doi:10.1016/j.molcel.2015.08.002
- 1031 23. Katz J, Rognstad R. The Labeling of Pentose Phosphate from Glucose-14C and Estimation of  
1032 the Rates of Transaldolase, Transketolase, the Contribution of the Pentose Cycle, and  
1033 Ribose Phosphate Synthesis\*. *Biochemistry*. 1967;6: 2227–2247. doi:10.1021/bi00859a046
- 1034 24. Kanzok SM. Substitution of the Thioredoxin System for Glutathione Redudase in  
1035 *Drosophila melanogaster*.



- 1036 25. Bauer H, Kanzok SM, Schirmer RH. Thioredoxin-2 but Not Thioredoxin-1 Is a Substrate of  
1037 Thioredoxin Peroxidase-1 from *Drosophila melanogaster*. *Journal of Biological Chemistry*.  
1038 2002;277: 17457–17463. doi:10.1074/jbc.M200636200
- 1039 26. Dolezal T, Krejčová G, Bajgar A, Nedbalová P, Strasser P. Molecular regulations of  
1040 metabolism during immune response in insects. *Insect Biochemistry and Molecular  
1041 Biology*. 2019;109: 31–42. doi:10.1016/j.ibmb.2019.04.005
- 1042 27. Hughes MB, Lucchesi JC. Genetic Rescue of a Lethal “Null” Activity Allele of 6-  
1043 Phosphogluconate Dehydrogenase in *Drosophila melanogaster*. *Science*. 1977;196: 1114–  
1044 1115. doi:10.1126/science.404711
- 1045 28. Duffy JB, Harrison DA, Perrimon N. Identifying loci required for follicular patterning using  
1046 directed mosaics. *Development*. 1998;125: 2263–2271. doi:10.1242/dev.125.12.2263
- 1047 29. Panday A, Sahoo MK, Osorio D, Batra S. NADPH oxidases: an overview from structure to  
1048 innate immunity-associated pathologies. *Cell Mol Immunol*. 2015;12: 5–23.  
1049 doi:10.1038/cmi.2014.89
- 1050 30. Honti V, Csordás G, Márkus R, Kurucz É, Jankovics F, Andó I. Cell lineage tracing reveals the  
1051 plasticity of the hemocyte lineages and of the hematopoietic compartments in *Drosophila  
1052 melanogaster*. *Molecular Immunology*. 2010;47: 1997–2004.  
1053 doi:10.1016/j.molimm.2010.04.017
- 1054 31. Yu W, Wang Z, Zhang K, Chi Z, Xu T, Jiang D, et al. One-Carbon Metabolism Supports S-  
1055 Adenosylmethionine and Histone Methylation to Drive Inflammatory Macrophages.  
1056 *Molecular Cell*. 2019;75: 1147–1160.e5. doi:10.1016/j.molcel.2019.06.039
- 1057 32. Parkhitko AA, Jouandin P, Mohr SE, Perrimon N. Methionine metabolism and  
1058 methyltransferases in the regulation of aging and lifespan extension across species. *Aging  
1059 Cell*. 2019 [cited 6 Sep 2019]. doi:10.1111/accel.13034
- 1060 33. Nappi AJ, Vass E. Hydroxyl radical formation resulting from the interaction of nitric oxide  
1061 and hydrogen peroxide. *Biochimica et Biophysica Acta (BBA) - General Subjects*.  
1062 1998;1380: 55–63. doi:10.1016/S0304-4165(97)00125-6
- 1063 34. Nappi AJ, Vass E. Hydrogen Peroxide Production in Immune-Reactive *Drosophila  
1064 melanogaster*. *The Journal of Parasitology*. 1998;84: 1150. doi:10.2307/3284664
- 1065 35. Owusu-Ansah E, Banerjee U. Reactive oxygen species prime *Drosophila* haematopoietic  
1066 progenitors for differentiation. *Nature*. 2009;461: 537–541. doi:10.1038/nature08313
- 1067 36. Sinenko SA, Starkova TYu, Kuzmin AA, Tomilin AN. Physiological Signaling Functions of  
1068 Reactive Oxygen Species in Stem Cells: From Flies to Man. *Frontiers in Cell and  
1069 Developmental Biology*. 2021;9. doi:10.3389/fcell.2021.714370
- 1070 37. Dudzic JP, Kondo S, Ueda R, Bergman CM, Lemaitre B. *Drosophila* innate immunity:  
1071 regional and functional specialization of prophenoloxidases. *BMC Biol*. 2015;13.  
1072 doi:10.1186/s12915-015-0193-6
- 1073 38. Molina-Cruz A, DeJong RJ, Charles B, Gupta L, Kumar S, Jaramillo-Gutierrez G, et al.  
1074 Reactive Oxygen Species Modulate *Anopheles gambiae* Immunity against Bacteria and  
1075 Plasmodium. *Journal of Biological Chemistry*. 2008;283: 3217–3223.  
1076 doi:10.1074/jbc.M705873200
- 1077 39. DeJong RJ, Miller LM, Molina-Cruz A, Gupta L, Kumar S, Barillas-Mury C. Reactive oxygen  
1078 species detoxification by catalase is a major determinant of fecundity in the mosquito  
1079 *Anopheles gambiae*. *Proceedings of the National Academy of Sciences*. 2007;104: 2121–  
1080 2126. doi:10.1073/pnas.0608407104

- 1081 40. Kondo S, Ueda R. Highly Improved Gene Targeting by Germline-Specific Cas9 Expression in  
1082 *Drosophila*. *Genetics*. 2013;195: 715–721. doi:10.1534/genetics.113.156737
- 1083 41. Moos M, Korbelová J, Štětina T, Opekar S, Šimek P, Grgac R, et al. Cryoprotective  
1084 Metabolites Are Sourced from Both External Diet and Internal Macromolecular Reserves  
1085 during Metabolic Reprogramming for Freeze Tolerance in *Drosophilid* Fly, *Chymomyza*  
1086 *costata*. *Metabolites*. 2022;12: 163. doi:10.3390/metabo12020163
- 1087 42. Yildirim K, Winkler B, Pogodalla N, Mackensen S, Baldenius M, Garcia L, et al. Redundant  
1088 functions of the SLC5A transporters Rumpel, Bumpel, and Kumpel in ensheathing glial  
1089 cells. *Biology Open*. 2022;11: bio059128. doi:10.1242/bio.059128
- 1090 43. Volkenhoff A, Weiler A, Letzel M, Stehling M, Klämbt C, Schirmeier S. Glial Glycolysis Is  
1091 Essential for Neuronal Survival in *Drosophila*. *Cell Metabolism*. 2015;22: 437–447.  
1092 doi:10.1016/j.cmet.2015.07.006
- 1093 44. Schindelin J, Arganda-Carreras I, Frise E, Kaynig V, Longair M, Pietzsch T, et al. Fiji: an open-  
1094 source platform for biological-image analysis. *Nat Methods*. 2012;9: 676–682.  
1095 doi:10.1038/nmeth.2019

1096

## 1097 **Supporting information**

1098

### 1099 **S1 Fig. Cytoplasmic trehalase expression in hemocytes and wing imaginal disc.**

1100 *Treh[RAΔG4]* with a knocked-in Gal4 in the *Treh-RA* transcriptional variant drives UAS-GFP  
1101 expression in the cytoplasmic trehalase expression pattern (cTreh>GFP). (A,B) Differential  
1102 interference contrast (DIC) combined with fluorescence microscopy using 20x objective. (A)  
1103 Hemocytes from uninfected 3<sup>rd</sup> instar larvae with no expression of cTreh>GFP. (B) Hemocytes  
1104 from larvae 22 hours after wasp infection - while large flat lamellocytes express cTreh>GFP, no  
1105 expression was detected in both round and spread plasmatocytes. (C) Parasitoid egg  
1106 encapsulated by lamellocytes expressing cTreh>GFP 24 hours after infection - DIC (left), green  
1107 fluorescence (middle) and merged (right) image from a Leica Thunder Imaging Systems  
1108 microscope using 20x objective. (D,E) Wing imaginal disc expressing cTreh>GFP similarly in  
1109 uninfected (D) and infected (E) larvae. (D) DIC (left), green fluorescence (middle) and merged  
1110 (right) image using 20x objective. (E) Merged image only.

1111

### 1112 **S2 Fig. Cytoplasmic trehalase is expressed in glial cells of the central nervous system.**

1113 *Treh[RAΔG4]* with a knocked-in Gal4 in the *Treh-RA* transcriptional variant drives UAS-GFP  
1114 expression in the cytoplasmic trehalase expression pattern (cTreh>GFP). (A-C, E-G) are single  
1115 focal plane images that show cTreh>GFP (green) expression, Rumpel (magenta) predominantly  
1116 expressed in ensheathing glia cells and Elav (blue) a neuronal specific marker. (D and H) are  
1117 maximum projections highlighting the expression of cTreh>GFP (green). cTreh>GFP (green)  
1118 shows overlap with Rumpel (magenta) but not Elav (blue), suggesting that the cytoplasmic  
1119 trehalase is expressed in ensheathing glia, but not neurons. (I-K, M-O) are single confocal  
1120 sections, cTreh>GFP (green), Repo (magenta) expressed in all glial nuclei and Tret1-1 (blue)  
1121 expressed in perineurial glia, the outermost glial cell layer of the blood-brain barrier. (L and P)  
1122 show a Z projection of larval brains with cTreh>GFP (green) and Repo (magenta) staining. There  
1123 is overlap in expression of cTreh>GFP (green) and Repo (magenta). There is no evidence of

1124 cTreh>GFP (green) expression in perineurial glia (blue). (A-D and I-L) are brains of uninfected 3<sup>rd</sup>  
1125 instar larvae. (E-H and M-P) are 3<sup>rd</sup> instar larval brains of infected animals. (A, C-D, E, G-H, I, K-L,  
1126 M, O-P) show an overview of the central nervous system using 20x objective. (B, F, J, N) show a  
1127 close up of the ventral nerve cord using 63x objective.

1128

1129 **S3 Fig. Scheme of <sup>13</sup>C isotope labeling of metabolites in the cyclic pentose phosphate**  
1130 **pathway.**

1131 The cyclic pentose phosphate pathway (PPP) can recycle six pentoses – 5C in black boxes  
1132 (ribose-5-phosphate or xylulose-5-phosphate), which are formed from glucose-6-phosphate by  
1133 oxidative PPP (OxPPP), into four hexoses - 6C in blue boxes (glucose-6-phosphates) and two  
1134 trioses - 3C in blue boxes (glyceraldehyde-3-phosphates) by using transketolase and  
1135 transaldolase. The recycled glucose-6-phosphates can enter further rounds of cyclic PPP to  
1136 maximize NADPH production. Glyceraldehyde-3-phosphates can re-enter glycolysis.  
1137 Metabolizing fully labeled glucose-<sup>13</sup>C<sub>6</sub> in cyclic PPP produces partially labeled glucose-6-  
1138 phosphate. Initially, when labeled metabolites begin to enter cellular metabolism and represent  
1139 a minority fraction, the most common intermediate in cyclic PPP (and also in glycolysis) is fully  
1140 labeled glyceraldehyde-3-phosphate-<sup>13</sup>C<sub>3</sub>, which combines with unlabeled metabolites to form  
1141 glucose-6-phosphate-<sup>13</sup>C<sub>3</sub> partially labeled at 3 carbons (pink highlight). Later, when more  
1142 labeled metabolites enter cellular metabolism, the most common product of cyclic PPP is  
1143 glucose-6-phosphate-<sup>13</sup>C<sub>2</sub> (three of seven possible combinations after the first round, as  
1144 highlighted in yellow). Red circles represent <sup>13</sup>C carbons, gray circles <sup>12</sup>C carbons.

1145

1146 **S4 Fig. Thioredoxin system in hemocytes.**

1147 (A) Scheme of the thioredoxin system in *Drosophila*. The reduction of the disulfide thioredoxin  
1148 Trx S<sub>2</sub> to the reduced dithiol form Trx (SH)<sub>2</sub> is catalyzed by NADPH-dependent thioredoxin  
1149 reductase (Trxr). Thioredoxin reduces glutathione disulfide (GSSG) to glutathione (GSH), an  
1150 antioxidant that scavenges radicals via glutathione peroxidase (Gpx). *Drosophila* thioredoxin Trx-  
1151 2 may also be a substrate for thioredoxin peroxidases (peroxiredoxins, Prx) that detoxify  
1152 peroxides. (B) Bulk RNAseq of genes of the thioredoxin system expressed in circulating  
1153 hemocytes from uninfected (Uninf, light gray bars) and infected (INF, dark gray bars) larvae 18  
1154 hours after the start of infection. Hemocytes express thioredoxin reductase *Trxr1*, thioredoxin  
1155 *Trx-2*, and various putative peroxiredoxins and glutathione peroxidases. Expressions are shown  
1156 in transcripts per million (TPM), bars represent mean values; dots represent biological  
1157 replicates, error bars represent ± SEM. (C) Single-cell RNAseq plot of *Trxr1* expression in  
1158 hemocytes from wasp-infected larvae for 48 hours, obtained from the single-cell RNA-seq data  
1159 portal of DRSC/Perrimon lab (<https://www.flyrnai.org/scRNA/>), showing stronger expression in  
1160 lamellocytes. *Atilia* (lamellocyte marker) and *Hml* (plasmatocyte marker) expression is shown for  
1161 comparison. (D) Graph of *Trx-2* expression in hemocytes based on single-cell RNA-seq data  
1162 portal ([https://www.flyrnai.org/tools/single\\_cell/web/](https://www.flyrnai.org/tools/single_cell/web/)) showing that a higher percentage of  
1163 lamellocytes express *Trx-2* more strongly than other hemocytes.

1164

1165 **S5 Fig. Partial labelling of <sup>13</sup>C glucose-6-phosphate and ribulose-5-phosphate ex vivo.**

1166 Bars show the mean normalized peak area of glucose-6-phosphate and ribulose-5-phosphate  
1167 with different numbers of <sup>13</sup>C in the molecules (m+1 with one <sup>13</sup>C ... m+6 with six <sup>13</sup>C) measured

1168 in hemocytes incubated *ex vivo* with either D-glucose- $^{13}\text{C}_6$  (gray) or  $\alpha,\alpha$ -trehalose- $^{13}\text{C}_{12}$  (blue).  
1169 Samples were obtained from hemocytes of uninfected (depicted by Uninf) or infected (depicted  
1170 by INF) larvae. Each dot represents a biological replicate.

1171

1172 **S6 Fig. Partial labelling of  $^{13}\text{C}$  glucose-6-phosphate, ribulose-5-phosphate and ribose-5-**  
1173 **phosphate *in vivo*.**

1174 Bars show the mean normalized peak area of glucose-6-phosphate, ribulose-5-phosphate and  
1175 ribose-5-phosphate with different numbers of  $^{13}\text{C}$  in the molecules (m+1 with one  $^{13}\text{C}$  ... m+6  
1176 with six  $^{13}\text{C}$ ) measured in hemocytes from larvae fed D-glucose- $^{13}\text{C}_6$  for six hours. Samples were  
1177 obtained from hemocytes of uninfected (depicted by Uninf, light grey) or infected (depicted by  
1178 INF, dark grey) larvae. Each dot represents a biological replicate.

1179

1180 **S7 Fig. Scheme of  $^{13}\text{C}$  isotope labeling of metabolites in the non-oxidative pentose phosphate**  
1181 **pathway.**

1182 The nonoxidative pentose phosphate pathway (PPP) produces ribose-5-phosphate from the  
1183 glycolytic products fructose-6-phosphate and glyceraldehyde-3-phosphate by using  
1184 transketolase and transaldolase. Metabolism of fully labeled glucose- $^{13}\text{C}_6$  in non-oxidative PPP  
1185 produces mostly partially labeled ribose-5-phosphates (with  $^{13}\text{C}_4$ /m+4 being least likely) and less  
1186 fully labeled ribose-5-phosphate- $^{13}\text{C}_5$ . Red circles represent  $^{13}\text{C}$  carbons, gray circles  $^{12}\text{C}$  carbons,  
1187 orange rectangles represent labeling in ribulose-5-phosphate, grey rectangles in ribose-5-  
1188 phosphate.

1189

1190 **S8 Fig. Analysis of hemocyte metabolism by  $^{13}\text{C}$  stable isotope tracing.**

1191 Bars show the mean metabolite amounts - unlabeled form or labeled with stable  $^{13}\text{C}$  isotope, or  
1192 both stacked, in one bar - expressed by the normalized peak area. Graphs labeled "*in vivo*" in  
1193 black box - larvae were fed labeled D-glucose- $^{13}\text{C}_6$ . Graphs labeled "*ex vivo*" in gray box -  
1194 hemocytes were incubated *ex vivo* with either labeled D-glucose- $^{13}\text{C}_6$  or  $\alpha,\alpha$ -trehalose- $^{13}\text{C}_{12}$ .  
1195 Samples were obtained from hemocytes or hemolymph from uninfected (Uninf) or infected  
1196 (INF) larvae. Phosphoenolpyruvate, pyruvate and UDP-Glucose graphs combine unlabeled (gray)  
1197 and fully (red) or partially (pink) labeled forms of metabolites; the percentages above the  
1198 columns express the fraction of the labelled from the total amount. Total Lactate shows  
1199 combined lactate- $^{12}\text{C}$  and lactate- $^{13}\text{C}$  from pelleted hemocytes and supernatant representing  
1200 the hemolymph. Citrate and malate show fully labeled  $^{13}\text{C}_3$  molecules. The sample from infected  
1201 larvae was compared with that from uninfected larvae using unpaired t test or ordinary two-way  
1202 ANOVA with multiple comparisons. Asterisks indicate p value (\*  $P < 0.05$ , \*\*  $P < 0.01$ , \*\*\*  $P <$   
1203  $0.001$ , \*\*\*\*  $P < 0.0001$ ) and are either above the bar in the corresponding color of the bar they  
1204 compare within the stacked bars, or in black for a simple comparison. A bar without asterisks  
1205 indicates a non-significant difference. Error bars represent  $\pm$  SEM.

1206

1207 **S9 Fig. Amount of AMP, ADP and ATP and their partial labelling *in vivo*.**

1208 Bars show the mean normalized peak area of AMP, ADP and ATP with different numbers of  $^{13}\text{C}$   
1209 in the molecules (m+1 with one  $^{13}\text{C}$  ... m+5 with five  $^{13}\text{C}$ ) and of unlabeled molecules ( $^{12}\text{C}_5$ )  
1210 measured in hemocytes from larvae fed D-glucose- $^{13}\text{C}_6$  for six hours. Samples were obtained

1211 from hemocytes of uninfected (Uninf, light gray) or infected (INF, dark gray) larvae. Each dot  
1212 represents a biological replicate. The sample from infected larvae was compared with that from  
1213 uninfected larvae using ordinary two-way ANOVA with Šídák's test for multiple comparisons and  
1214 by unpaired t test; asterisks indicate p value \*\* P < 0.01, \*\*\* P < 0.001, \*\*\*\* P < 0.0001; a bar  
1215 without asterisks indicates a non-significant difference. Error bars represent  $\pm$  SEM.

1216

#### 1217 **S10 Fig. Effects of cytoplasmic trehalase-specific mutations.**

1218 (A) Map of the *trehalase* gene with individual transcripts (RA-RG) and sequence from RA first  
1219 exons depicting wild-type, *Treh<sup>c1</sup>* and *Treh<sup>RAΔG4</sup>* mutations. *Treh<sup>c1</sup>* deletes 20 bp including the first  
1220 start codon. *Treh<sup>RAΔG4</sup>* deletes 47 bp removing both start codons, which is replaced by a cassette  
1221 containing the Gal4 coding sequence. Lines show introns, boxes show exons with coding  
1222 sequence in orange. (B,C) Heat map of 13C-labeled fraction of metabolites from control and  
1223 *Treh<sup>c1</sup>* (B) and *Treh<sup>RAΔG4</sup>* (C) hemocytes in uninfected (Uninf) and infected (INF) conditions  
1224 incubated *ex vivo* with labeled  $\alpha,\alpha$ -trehalose-<sup>13</sup>C<sub>12</sub>. (D) Number of lamellocytes 22 hours after  
1225 beginning of infection in control (*w<sup>1118</sup>*) and in the *Treh<sup>RAΔG4</sup>* mutant. Each dot represents number  
1226 of lamellocytes in one larva, line represents mean, samples were compared by unpaired t test.

1227

#### 1228 **S11 Fig. Compensatory expression of trehalase in the *Treh[RAΔG4]* mutant.**

1229 Transcript-specific analysis of *trehalase* expression by RT-qPCR 18 hours after the start of  
1230 infection. (A) The 25-fold increase in *Treh* expression in hemocytes (as measured by expression  
1231 of the common region for all *Treh* transcripts using Treh-F1/Treh-R1 primers) in control larvae  
1232 during infection is due to an increase in expression of *Treh-RA(DGE)* transcripts (Fig 1). (B) *Treh-*  
1233 *RA(DGE)* expression is disrupted by a knocked-in Gal4 driver in the *Treh<sup>RAΔG4</sup>* mutant, leading to a  
1234 one-third reduction in total *Treh* expression in hemocytes of uninfected larvae. (C) The lack of  
1235 *Treh-RA(DGE)* expression in the *Treh<sup>RAΔG4</sup>* mutant is compensated by increased *Treh-RB/RC*  
1236 expression, 7.5-fold in uninfected and 18-fold in infected larvae, whereas in wild-type larvae,  
1237 *Treh-RB/RC* expression does not change after infection; analyzed using Treh-RB-F/Treh-R2  
1238 primers. (A) This compensatory infection-induced expression leads to an overall 9-fold increase  
1239 in *Treh* expression in the *Treh<sup>RAΔG4</sup>* mutant compared to a 25-fold increase in infected wild-type  
1240 larvae. (A-C) Bars show mean fold change compared to control uninfected samples (expression  
1241 levels were normalized by *RpL32* expression in each sample), each dot represents a biological  
1242 replicate. Unpaired two-tailed t test (B) and ordinary one-way ANOVA with Tukey's multiple  
1243 comparisons test (C) were used to compare samples; asterisks indicate p value \*\* P < 0.01, \*\*\*\*  
1244 P < 0.0001; ns indicate non-significant difference. Error bars represent  $\pm$  SEM.

1245

#### 1246 **S12 Fig. Hemocytes from control larvae unable to induce mitotic recombination in hemocytes.**

1247 Hemocytes from uninfected larvae that were unable to generate clones by mitotic  
1248 recombination in hemocytes due to the lack of flippase (*FRT42D GFP / FRT42D Treh[cs1] RFP*;  
1249 *Srp-Gal4 / +*) - all hemocytes express both GFP and RFP markers (yellow when merged). These  
1250 larvae served as controls for larvae with mitotic recombination clones in hemocytes (Fig 6).  
1251 Differential interference contrast (DIC) and fluorescence microscopy using a 40x objective.

1252

1253 **S1 Table. Gene expression analysis by bulk RNAseq of circulating hemocytes, lymph gland and**  
1254 **wing disc during parasitoid wasp infection.**

1255 MS Excel sheets with gene expression in circulating hemocytes (first sheet), lymph gland and  
1256 wing disc (second sheet). RNA was extracted 72 hours after egg laying = time of infection = 0  
1257 hours, 81 hours after egg laying = 9 hours post infection/hpi and 90 hours after egg laying = 18  
1258 hpi), from hemocytes, lymph glands and wing discs of the third instar *w<sup>1118</sup>* larvae. Barcoded 3'-  
1259 end seq forward libraries were subjected to deep uni-directional sequencing of 75-base long  
1260 reads using Illumina NextSeq. Trimmed reads in Fastq files were mapped to the BDGP  
1261 *Drosophila melanogaster* release 6.29 genomic sequence (gene names correspond to this  
1262 release) using the Mapper for RNA Seq in Geneious prime software (Biomatters). Normalized  
1263 counts of reads mapped to each gene annotation were calculated as transcripts per million  
1264 (TPM), expression levels were compared using the DESeq2 method in Geneious prime software.

1265

1266 **S2 Table. Metabolomics and stable 13C isotope tracing in circulating hemocytes during**  
1267 **parasitoid wasp infection.**

1268 MS Excel sheets with stable 13C isotope tracing experiments. Values are raw or normalized  
1269 areas under respective chromatographic peaks. Data from the following experiments are in  
1270 individual sheets: [13C in vivo] – raw and normalized data from hemocytes obtained 22 hours  
1271 after start of infection from uninfected and infected *w<sup>1118</sup>* larvae fed a diet with 50% D-Glucose-  
1272 <sup>13</sup>C<sub>6</sub> for the last 6 hours (normalization factor determination in [13C in vivo normalization]  
1273 sheet). [13C ex vivo] raw and normalized data from hemocytes obtained 22 hours after start of  
1274 infection from uninfected and infected *Srp>P{y[+t7.7]=CaryP}attP2* control larvae and incubated  
1275 for 40 minutes in medium containing 5mM unlabeled trehalose and 0.5mM <sup>13</sup>C<sub>6</sub> labeled glucose  
1276 or 5mM <sup>13</sup>C<sub>12</sub> labeled trehalose and 0.5mM unlabeled glucose (normalization factor  
1277 determination in [13C ex vivo normalization] sheet). [13C ex vivo Trehcs1], [13C ex vivo Trehc1]  
1278 and [13C ex vivo TrehRAdG4] sheets - raw data from hemocytes obtained 22 hours after start of  
1279 infection from uninfected and infected *w<sup>1118</sup>* control and *Treh<sup>cs1</sup>*, *Treh<sup>c1</sup>* or *Treh<sup>RADG4</sup>* mutant  
1280 larvae and incubated for 40 minutes in medium containing 5mM <sup>13</sup>C<sub>12</sub> labeled trehalose and  
1281 0.5mM unlabeled glucose. [13C ex vivo Srp-Tret1-1-RNAi] raw and normalized data from  
1282 hemocytes obtained 22 hours after start of infection from uninfected and infected  
1283 *Srp>P{y[+t7.7]=CaryP}attP2* control larvae and larvae with hemocyte-specific Tret1-1 RNAi  
1284 *Srp>P{TRiP.HMS02573}attP2* and incubated for 40 minutes in medium containing 5mM <sup>13</sup>C<sub>12</sub>  
1285 labeled trehalose and 0.5mM unlabeled glucose.

1286

1287 **S1 File. Carbohydrate transport and metabolism gene expression analysis by bulk and single-**  
1288 **cell transcriptomics.**

1289 Table with bulk RNAseq gene expressions (transcripts per million - TPM, average values) of  
1290 genes from SLC2 and SLC17 family of sugar transporters in *Drosophila* – the intensity of the red  
1291 color corresponds to the TPM value. Bulk RNAseq expressions of selected genes in bar graphs -  
1292 each dot represents a biological replicate in TPM, bars represent mean ± SEM. Single cell-  
1293 RNAseq of circulating hemocytes – dot plots with average gene expressions in hemocyte  
1294 clusters; color gradient of the dot represents the expression level, the size represents  
1295 percentage of cells expressing the gene per cluster; downloaded from  
1296 [www.flyrnai.org/tools/single\\_cell/web/](http://www.flyrnai.org/tools/single_cell/web/). Single cell-RNAseq of circulating hemocytes - t-  
1297 Distributed Stochastic Neighbor Embedding (t-SNE) plots of Harmony-based batch correction of

1298 wasp infected 48 hours data sets downloaded from [www.flyrnai.org/scRNA/blood/](http://www.flyrnai.org/scRNA/blood/) (for  
1299 comparison, plots with plasmatocytes marker *Hml* and lamellocyte marker *Atilla* are shown).

1300

1301 **S2 File. Glycolytic and pentose phosphate pathway gene expression analysis by bulk and**  
1302 **single-cell RNAseq.**

1303 Diagram showing metabolic pathways and tables with gene expression corresponding to Fig 2.  
1304 Table with bulk RNAseq gene expressions (transcripts per million - TPM, average values) of  
1305 glycolytic and PPP genes in *Drosophila* – the intensity of the red color corresponds to the TPM  
1306 value. Expression of selected genes in bulk RNAseq (this work) shown as bar graphs (each dot  
1307 represents a biological replicate in TPM, bars represent mean  $\pm$  SEM) and single-cell RNAseq  
1308 (downloaded from [www.flyrnai.org/scRNA/blood/](http://www.flyrnai.org/scRNA/blood/) and [www.flyrnai.org/tools/single\\_cell/web/](http://www.flyrnai.org/tools/single_cell/web/))  
1309 shown by dot plots with average gene expressions in hemocyte clusters (color gradient of the  
1310 dot represents the expression level, the size represents percentage of cells expressing the gene  
1311 per cluster) and t-Distributed Stochastic Neighbor Embedding (t-SNE) plots of Harmony-based  
1312 batch correction of wasp infected 48 hours data sets (for comparison, plots with plasmatocytes  
1313 marker *Hml* and lamellocyte marker *Atilla* are shown).

1314

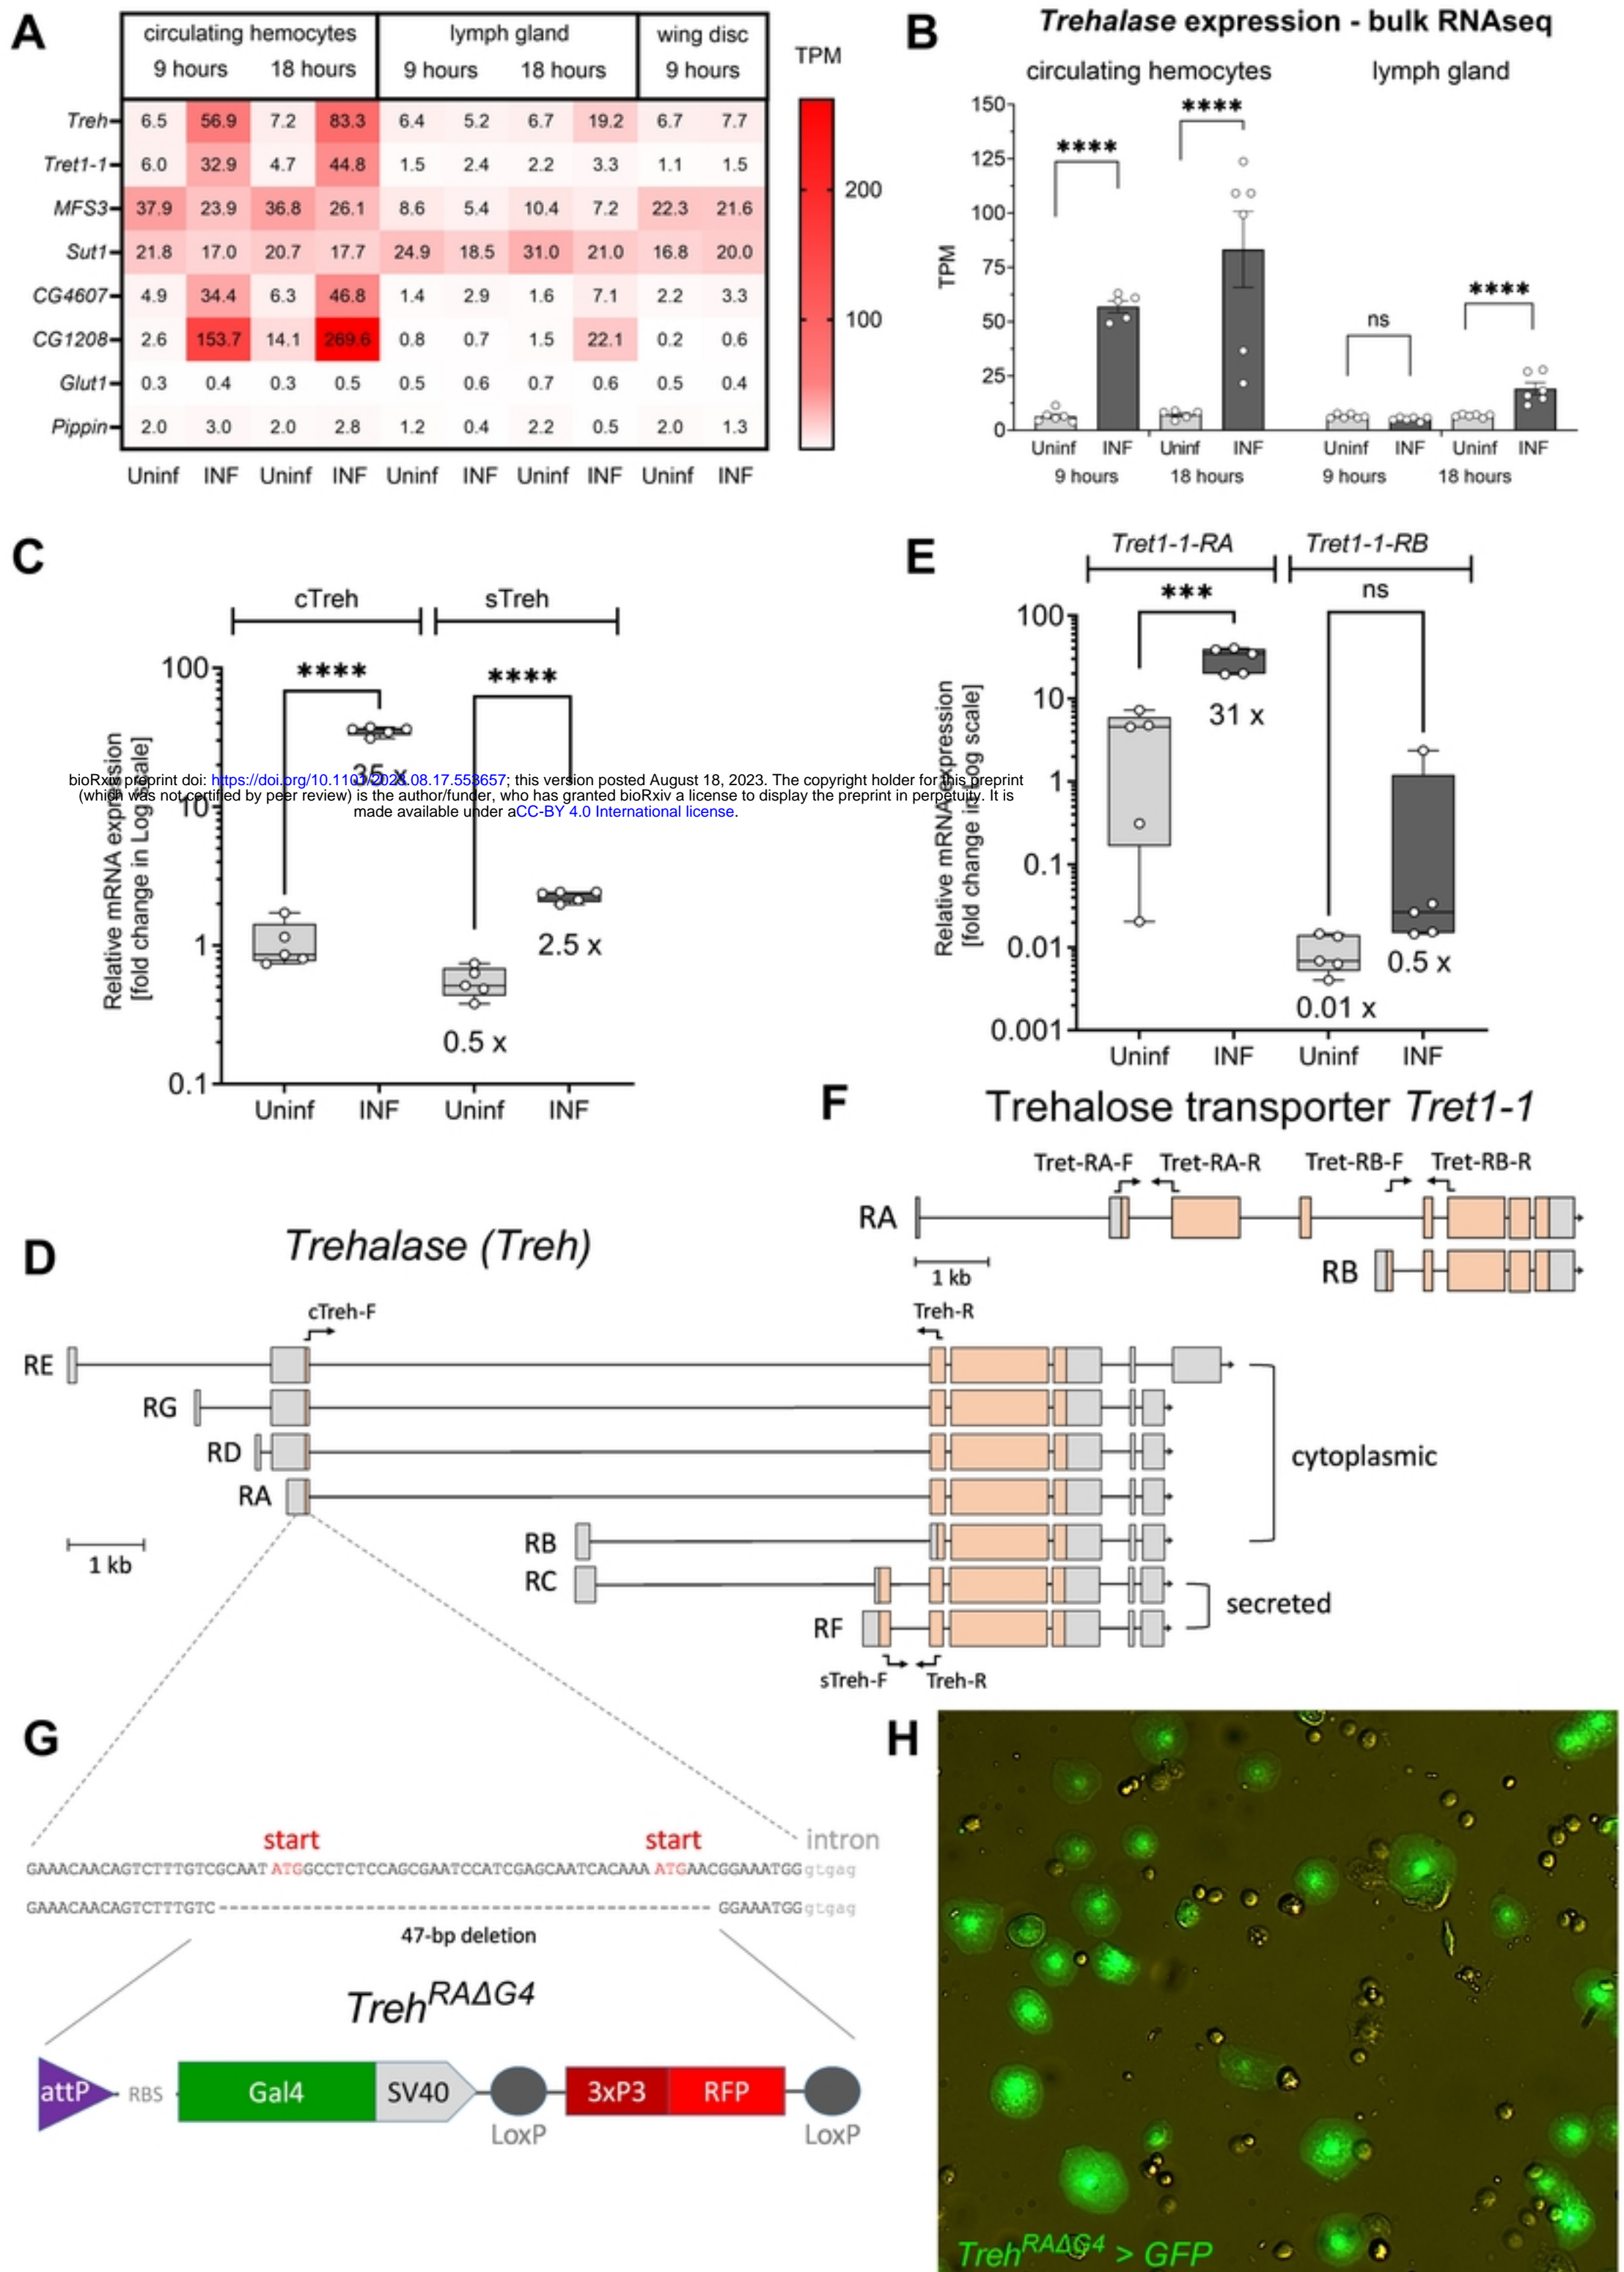

Fig 1



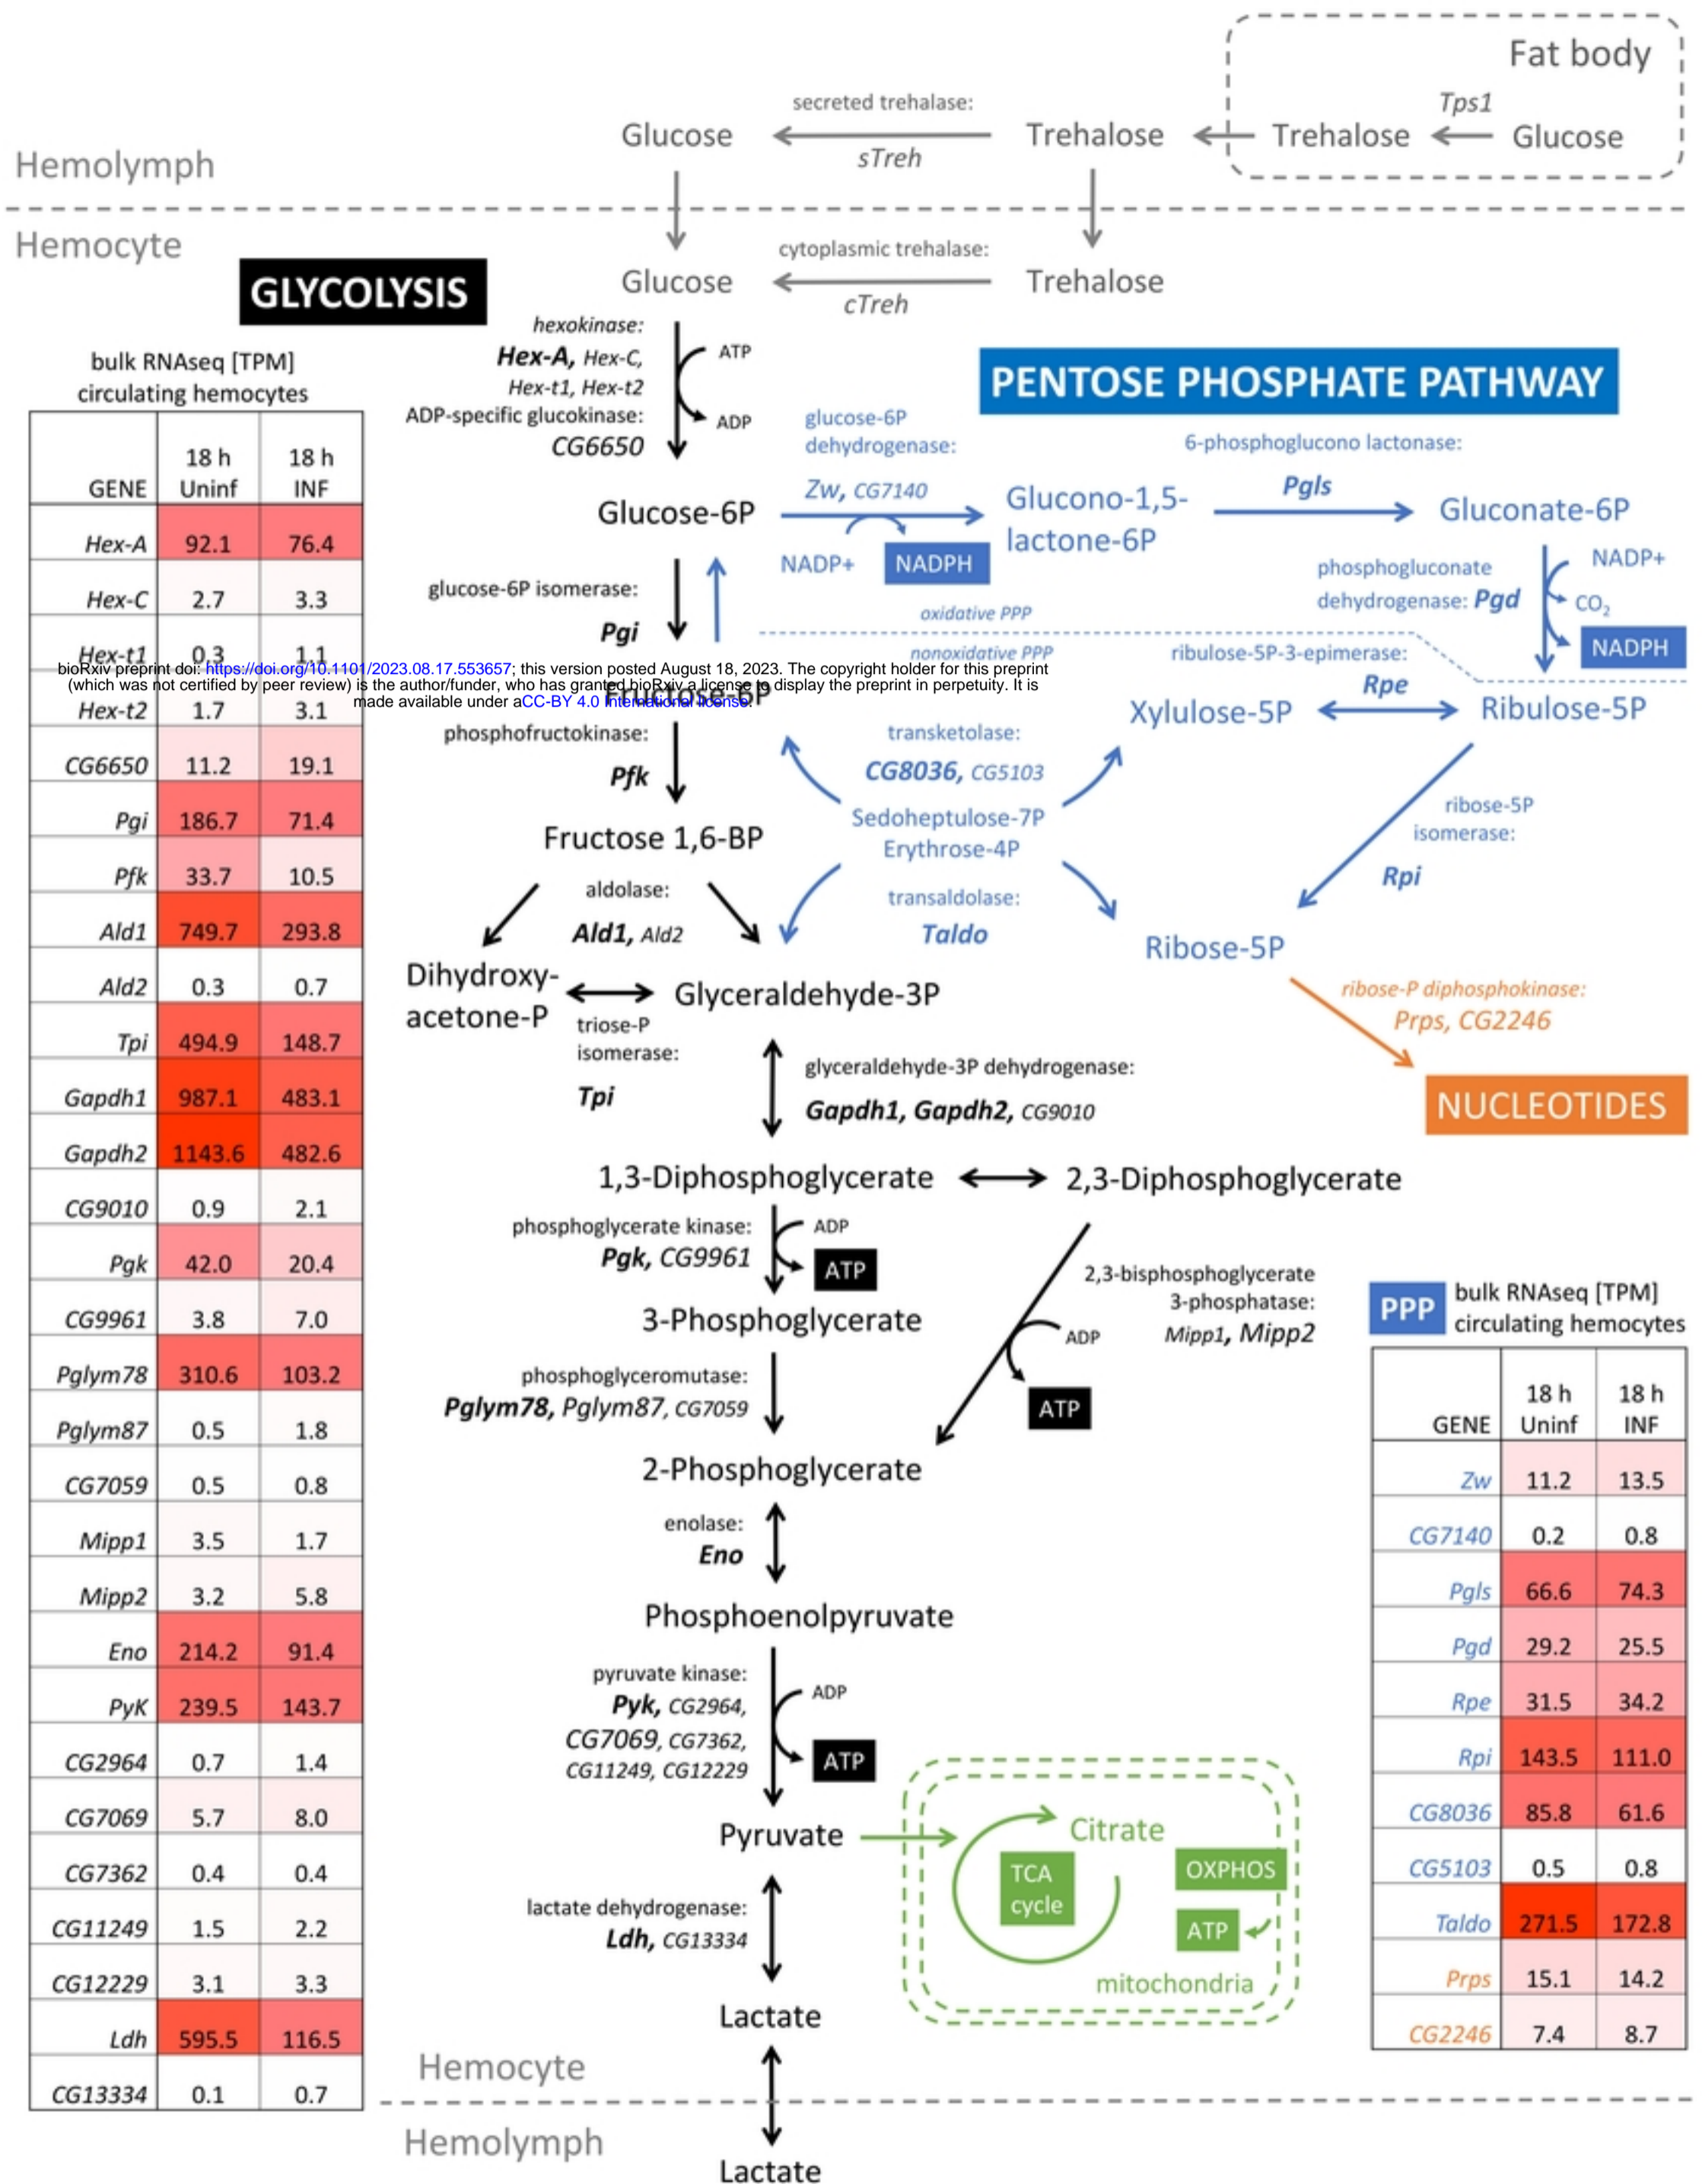

bulk RNAseq [TPM] circulating hemocytes

| GENE           | 18 h Uninf | 18 h INF |
|----------------|------------|----------|
| <i>Hex-A</i>   | 92.1       | 76.4     |
| <i>Hex-C</i>   | 2.7        | 3.3      |
| <i>Hex-t1</i>  | 0.3        | 1.1      |
| <i>Hex-t2</i>  | 1.7        | 3.1      |
| <i>CG6650</i>  | 11.2       | 19.1     |
| <i>Pgi</i>     | 186.7      | 71.4     |
| <i>Pfk</i>     | 33.7       | 10.5     |
| <i>Ald1</i>    | 749.7      | 293.8    |
| <i>Ald2</i>    | 0.3        | 0.7      |
| <i>Tpi</i>     | 494.9      | 148.7    |
| <i>Gapdh1</i>  | 987.1      | 483.1    |
| <i>Gapdh2</i>  | 1143.6     | 482.6    |
| <i>CG9010</i>  | 0.9        | 2.1      |
| <i>Pgk</i>     | 42.0       | 20.4     |
| <i>CG9961</i>  | 3.8        | 7.0      |
| <i>Pglym78</i> | 310.6      | 103.2    |
| <i>Pglym87</i> | 0.5        | 1.8      |
| <i>CG7059</i>  | 0.5        | 0.8      |
| <i>Mipp1</i>   | 3.5        | 1.7      |
| <i>Mipp2</i>   | 3.2        | 5.8      |
| <i>Eno</i>     | 214.2      | 91.4     |
| <i>Pyk</i>     | 239.5      | 143.7    |
| <i>CG2964</i>  | 0.7        | 1.4      |
| <i>CG7069</i>  | 5.7        | 8.0      |
| <i>CG7362</i>  | 0.4        | 0.4      |
| <i>CG11249</i> | 1.5        | 2.2      |
| <i>CG12229</i> | 3.1        | 3.3      |
| <i>Ldh</i>     | 595.5      | 116.5    |
| <i>CG13334</i> | 0.1        | 0.7      |

PPP bulk RNAseq [TPM] circulating hemocytes

| GENE          | 18 h Uninf | 18 h INF |
|---------------|------------|----------|
| <i>Zw</i>     | 11.2       | 13.5     |
| <i>CG7140</i> | 0.2        | 0.8      |
| <i>Pgls</i>   | 66.6       | 74.3     |
| <i>Pgd</i>    | 29.2       | 25.5     |
| <i>Rpe</i>    | 31.5       | 34.2     |
| <i>Rpi</i>    | 143.5      | 111.0    |
| <i>CG8036</i> | 85.8       | 61.6     |
| <i>CG5103</i> | 0.5        | 0.8      |
| <i>Taldo</i>  | 271.5      | 172.8    |
| <i>Prps</i>   | 15.1       | 14.2     |
| <i>CG2246</i> | 7.4        | 8.7      |

Fig 2

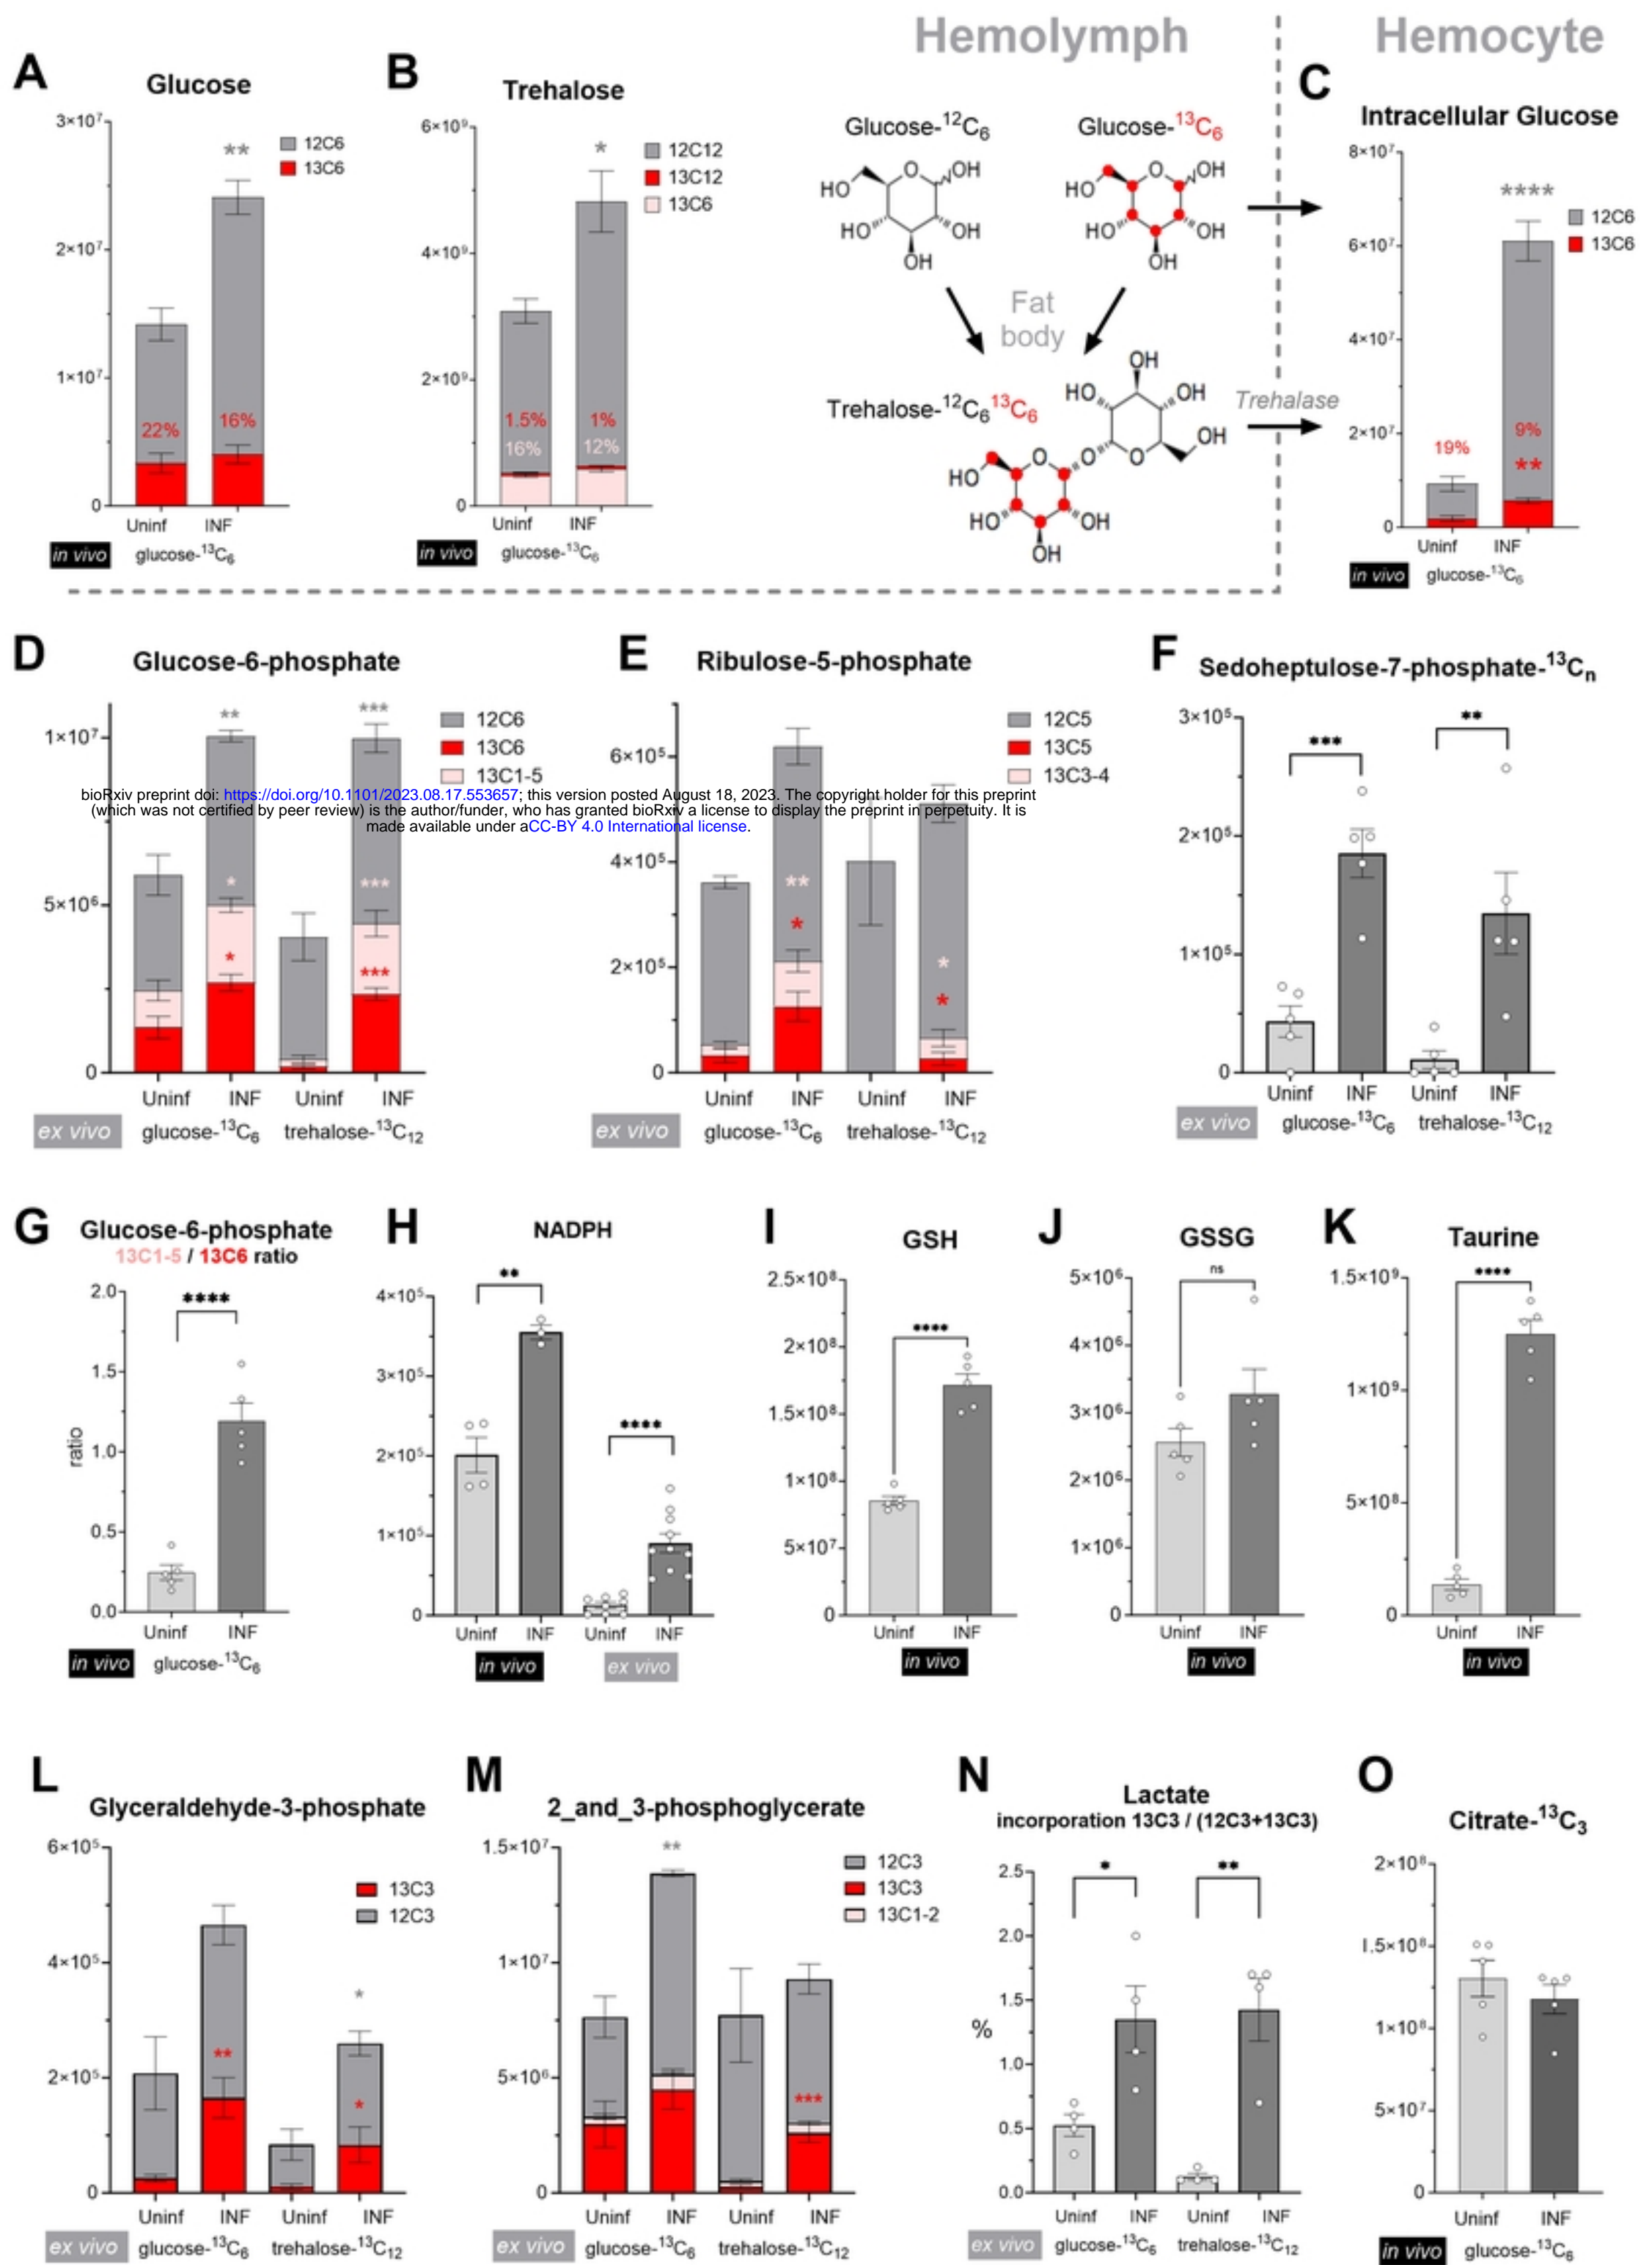

Fig 3

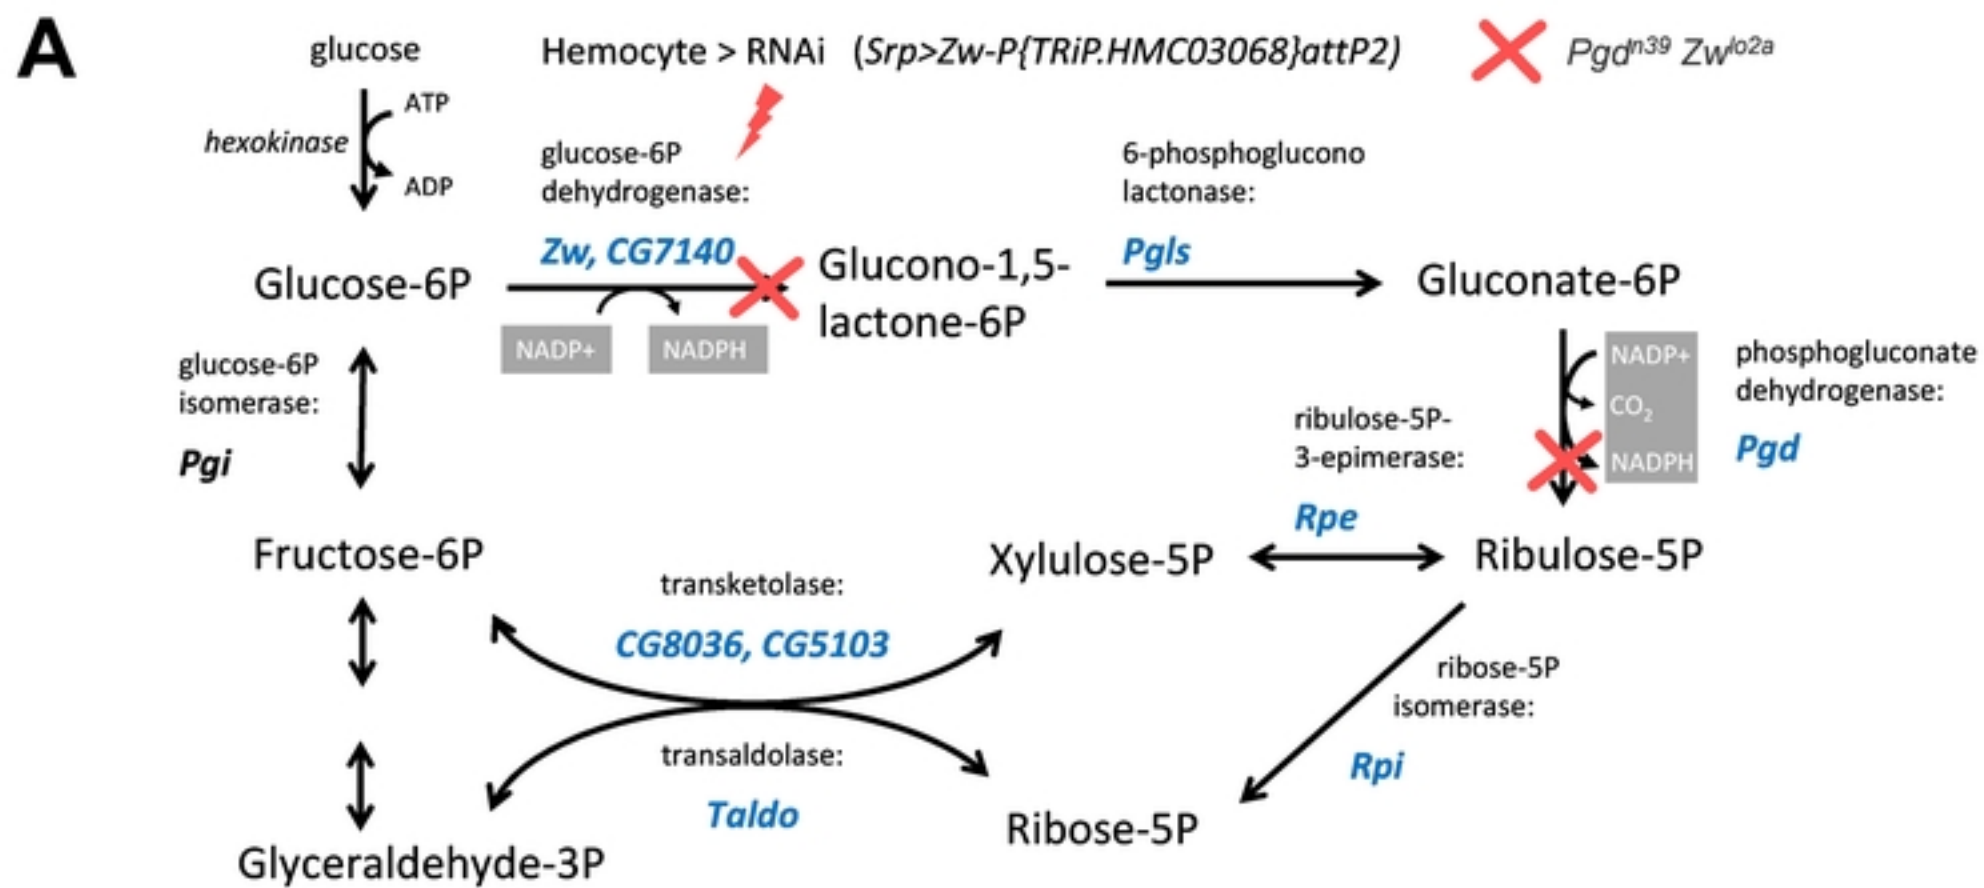

**B** Hemocyte > Zw-RNAi

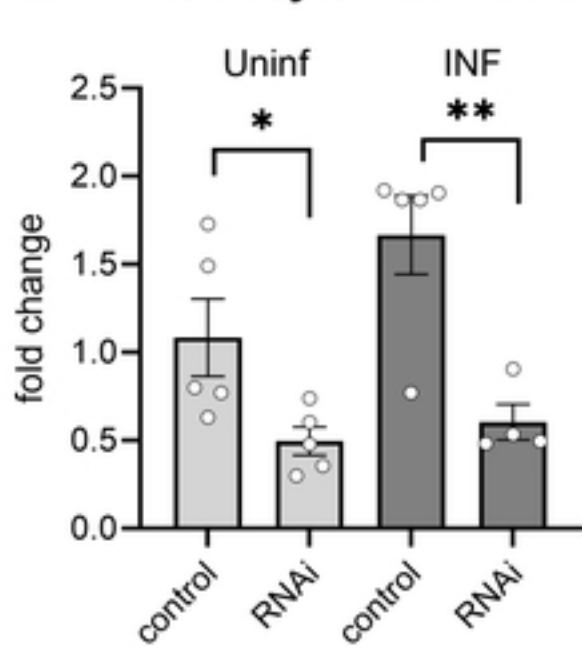

**C** lamellocytes plasmatocytes

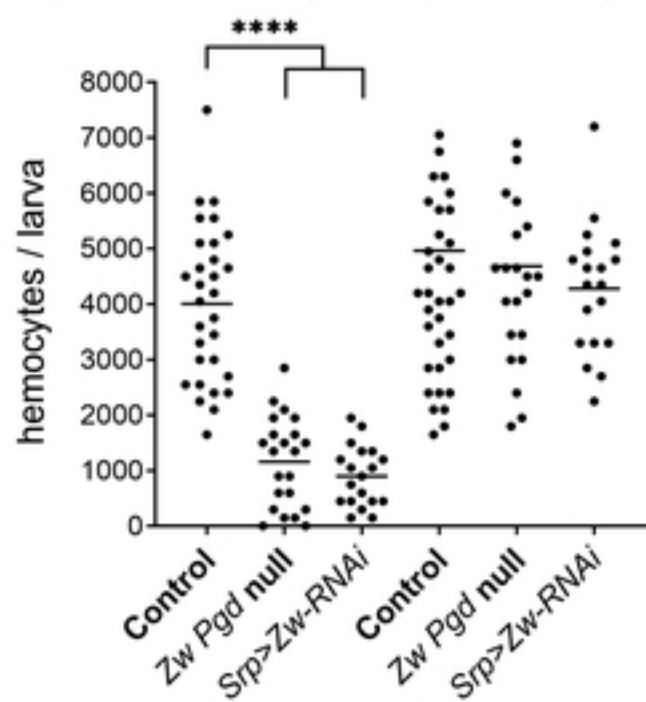

**D** Survival

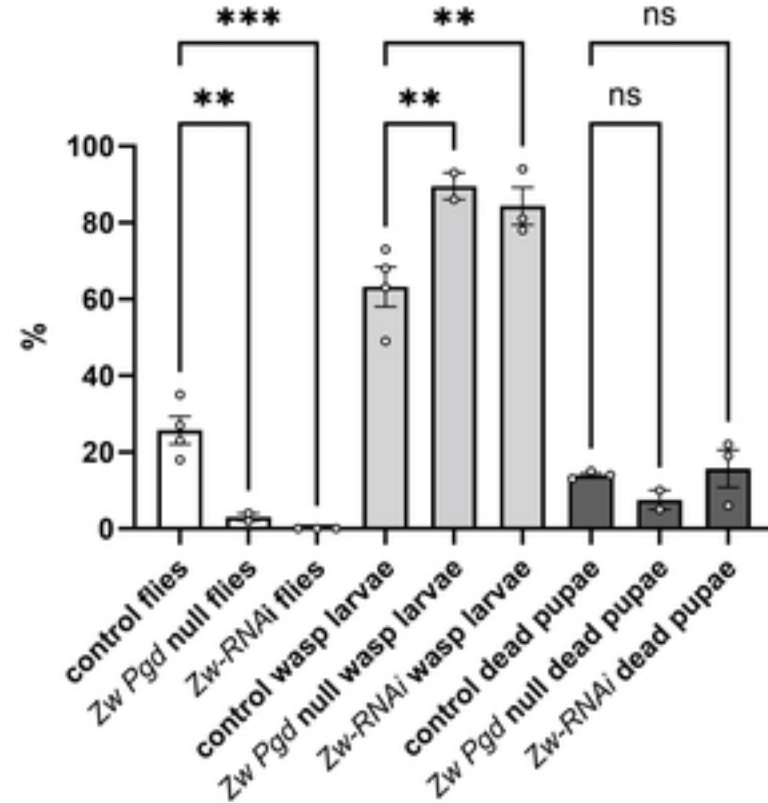

Fig 4

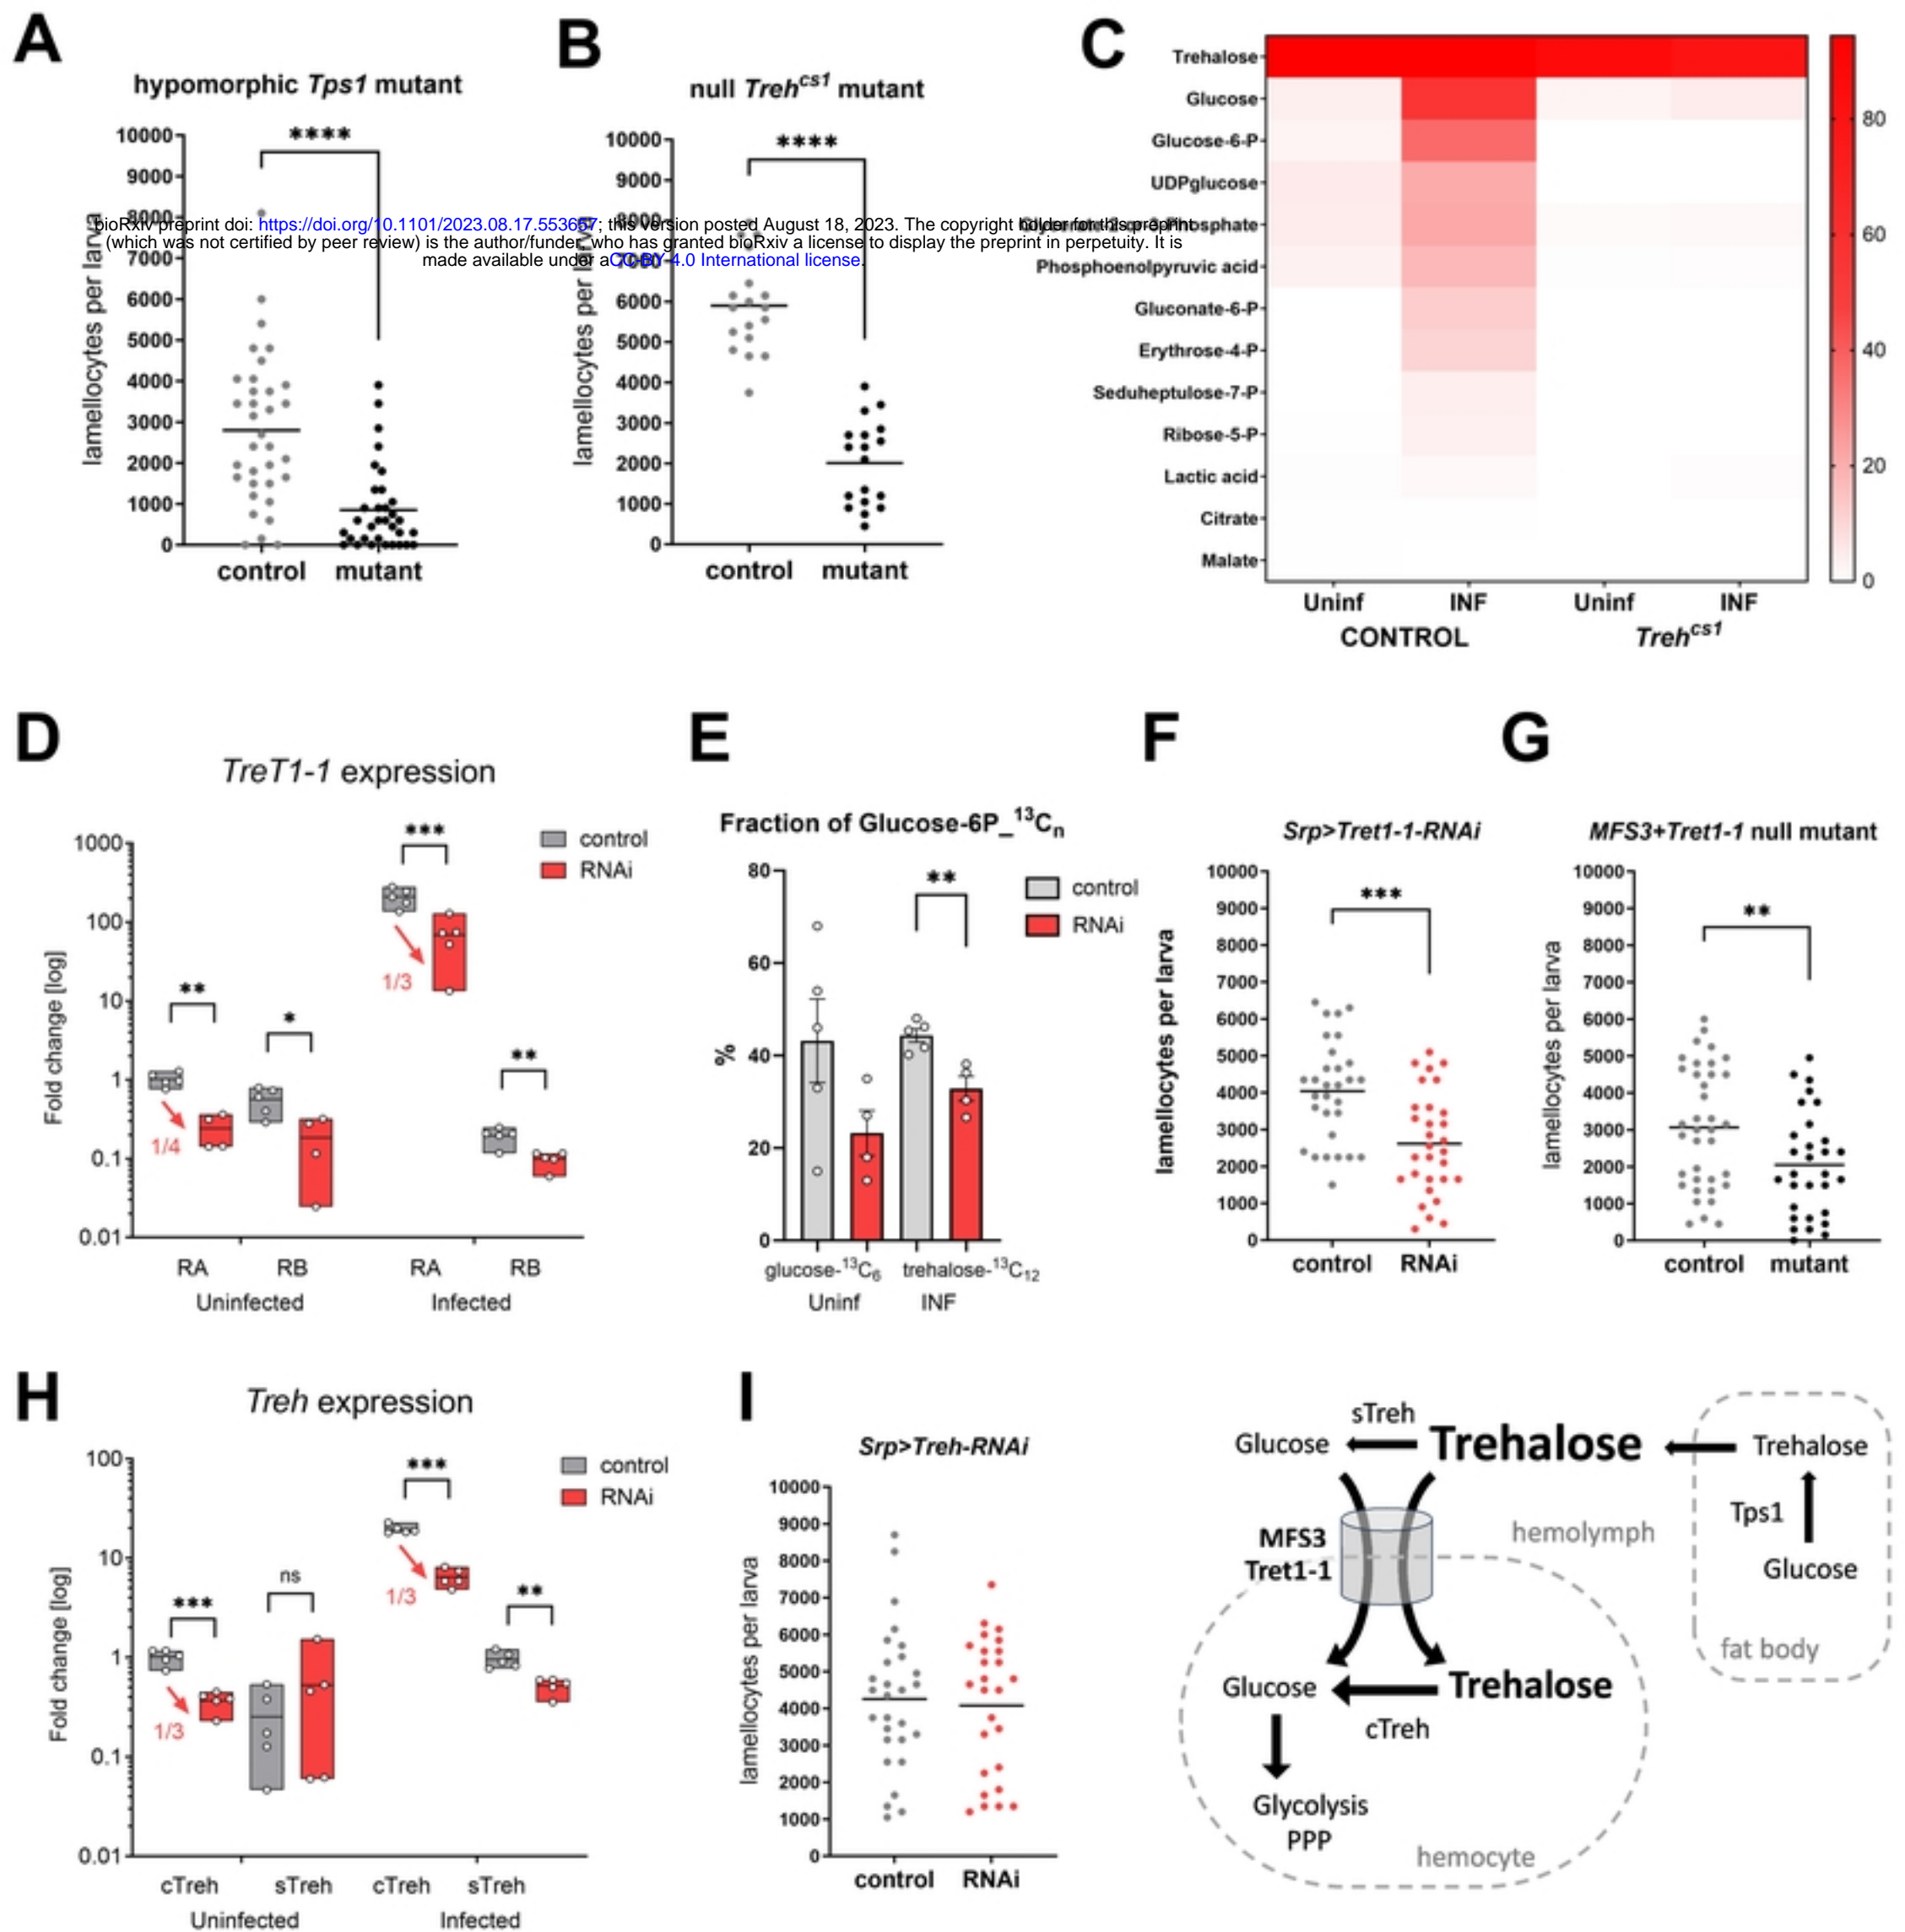

Fig 5

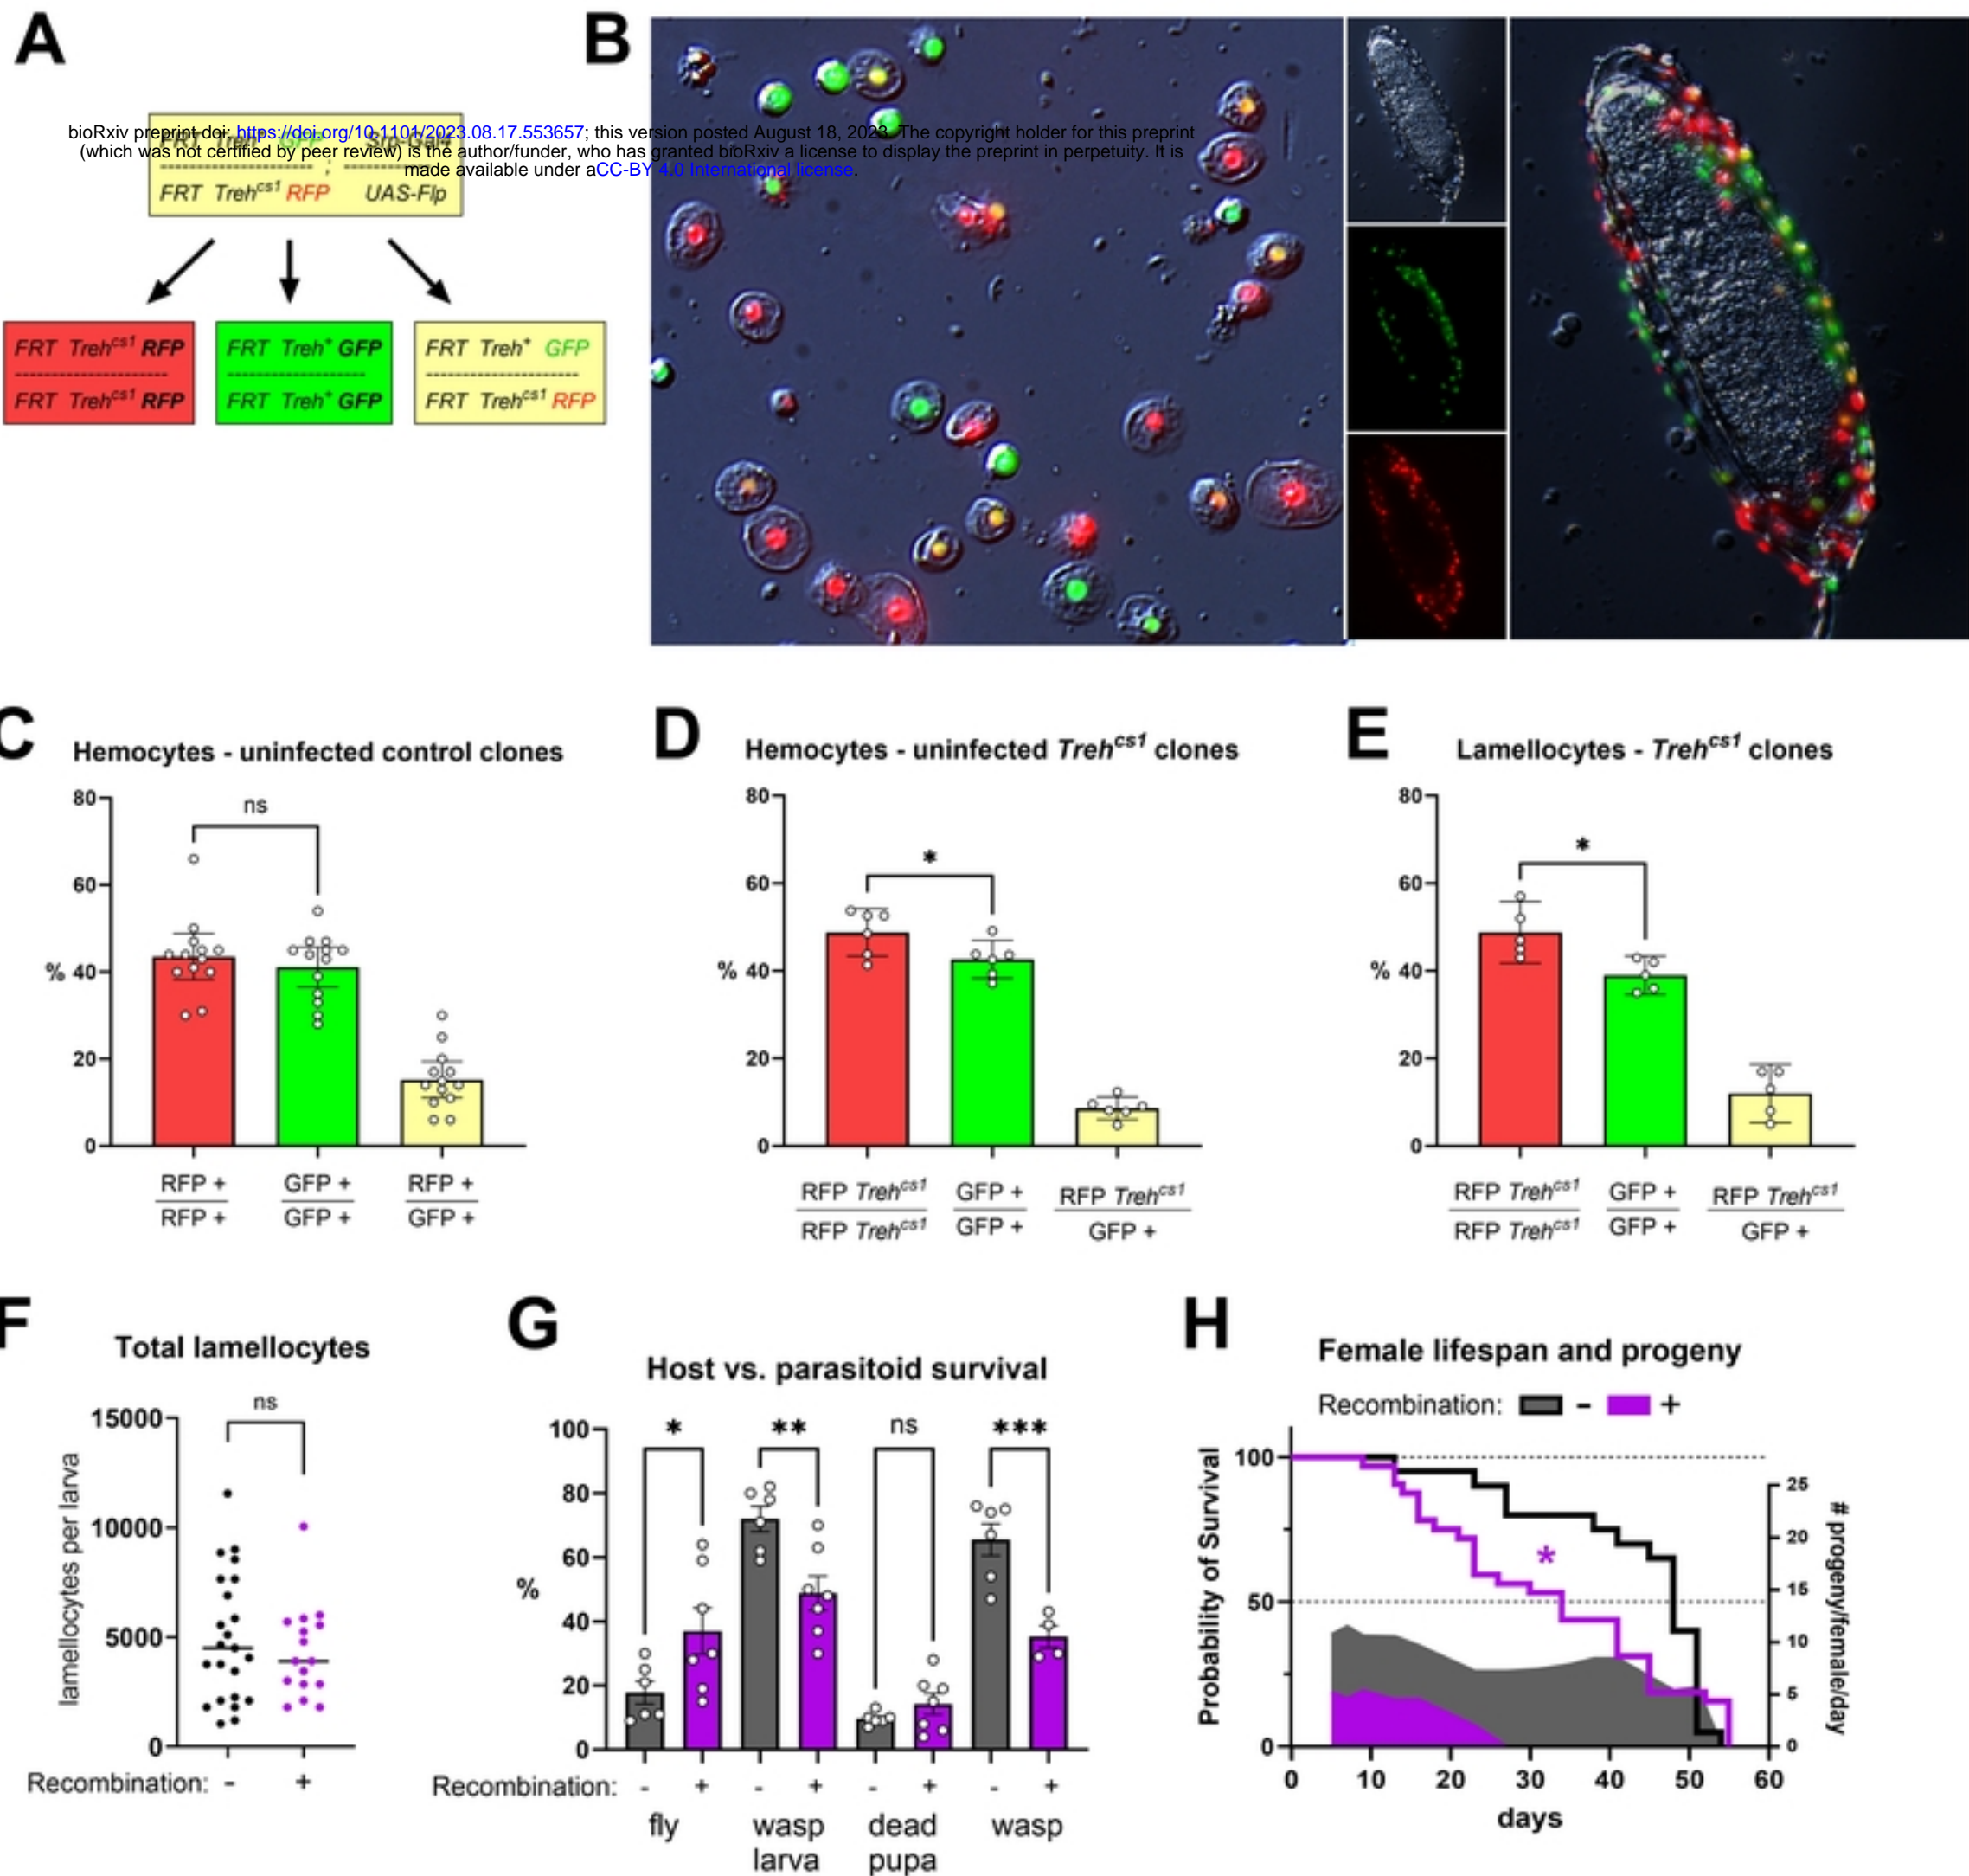

Fig 6

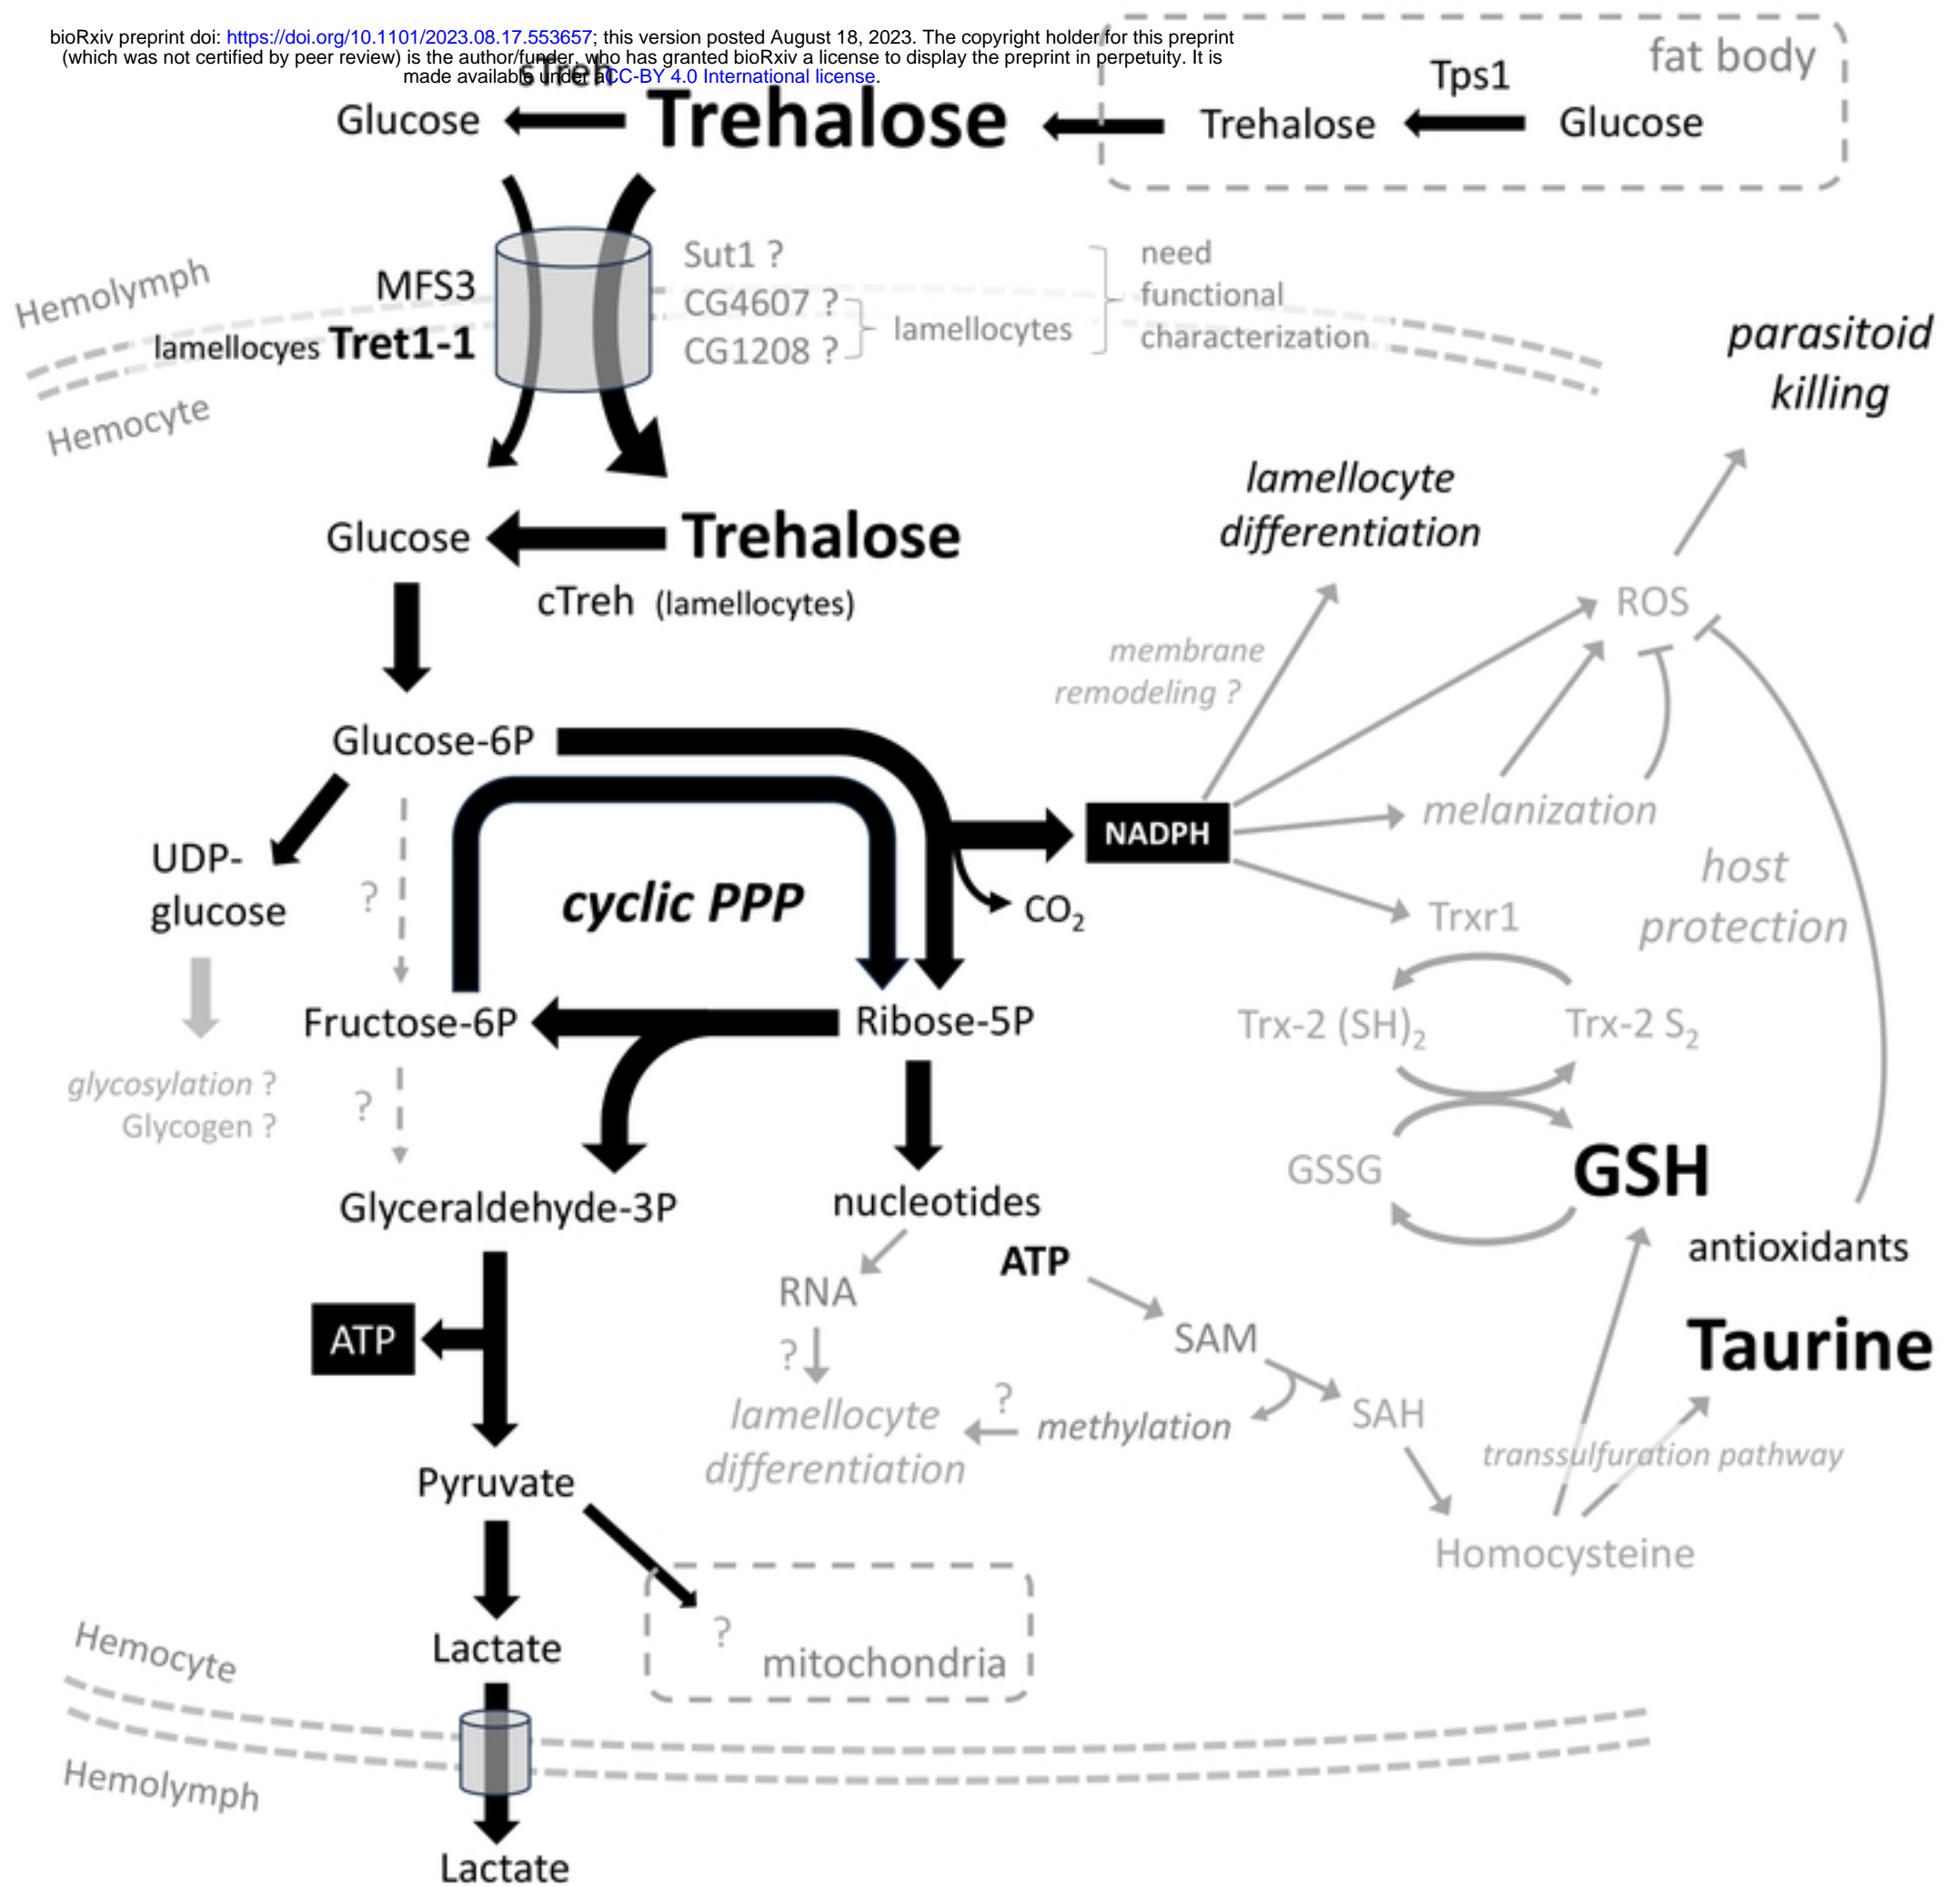

Fig 7
